# Supplementary material
Source: Copernicus journal article supplement (doi:10.5194/bg-23-4447-2026)
Supplement: Supplementary file 1 [file 260603_Thaw_slumps_supp_no_tracker.pdf › 260603_Thaw_slumps_supp_no_tracker.pdf]

# **Supplementary material – In-depth characterisation of organic matter lability and composition from Arctic Permafrost thaw slumps**

Marco A. Bolandini<sup>1</sup>, Negar Haghipour<sup>1,2</sup>, Kirsi H. Keskitalo<sup>4</sup>, Jorien E. Vonk<sup>3</sup>, Jordon D. Hemingway<sup>1</sup>, Timothy I. Eglinton<sup>1</sup>, Lisa Bröder<sup>1</sup>

5 <sup>1</sup>Geological Institute, Department of Earth and Planetary Sciences, ETH Zurich, Sonneggstrasse 5, 8092 Zurich, Switzerland

<sup>2</sup>Laboratory for Ion Beam Physics, Department of Physics, ETH Zurich, Otto-Stern-Weg 5, 8093 Zurich, Switzerland

<sup>3</sup>Earth and Climate, Faculty of Science, Vrije Universiteit Amsterdam, De Boelelaan 1085, 1081 HV Amsterdam, Netherlands

<sup>4</sup>School of Geography and Natural Sciences, Northumbria University, Ellison Place, Newcastle upon Tyne UK-NE1 8ST, United Kingdom

10 *Correspondence to:* Marco A. Bolandini (marcobo@caps.ethz.ch)

**Supplementary material**

Supplementary tables

**Table S1.** Summary of integrated thermal stability and radiocarbon parameters for each sample. Columns show: sample name, maximum activation energy ( $E_{\text{max}}$ , kJ mol<sup>-1</sup>), mean activation energy ( $E_{\text{mean}}$ , kJ mol<sup>-1</sup>) with standard deviation ( $\pm$  kJ mol<sup>-1</sup>), maximum probability density  $p_0(E)$ , residual oxidisable carbon to total organic carbon ratio (ROC/TOC, %), threshold temperature for ROC/TOC (°C), estimated mass of ROC carbon ( $\mu\text{g}$ ), weighted fraction modern radiocarbon ( $F^{14}\text{C}$ ) with standard deviation ( $\pm$ ), total carbon mass ( $\mu\text{g}$ ), and associated mass error ( $\pm \mu\text{g}$ ).

| Sample Name | E_max (kJ/mol) | E_mean (kJ/mol) | E_std (kJ/mol) | p0(E)_max | ROC/TOC (%) | Threshold ROC/TOC Temperature (°C) | Estimated ROC Carbon ( $\mu\text{g}$ ) | Weighted $F^{14}\text{C}$ | $F^{14}\text{C}$ std ( $\pm$ ) | Total Carbon Mass ( $\mu\text{g}$ ) | Total Mass Error ( $\pm \mu\text{g}$ ) |
|-------------|----------------|-----------------|----------------|-----------|-------------|------------------------------------|----------------------------------------|---------------------------|--------------------------------|-------------------------------------|----------------------------------------|
| Fm2_AL      | 158.271        | 151.802         | 17.086         | 0.027     | 4.300       | 477.000                            | 53.877                                 | 0.704                     | 0.009                          | 1252.964                            | 31.716                                 |
| Fm2_HO1     | 156.015        | 165.165         | 20.700         | 0.022     | 33.100      | 441.100                            | 155.063                                | 0.120                     | 0.007                          | 468.467                             | 11.858                                 |
| Fm2_HO2     | 160.526        | 161.850         | 17.133         | 0.029     | 31.900      | 417.900                            | 197.858                                | 0.072                     | 0.006                          | 620.243                             | 15.700                                 |
| Fm2_PL      | 152.256        | 162.963         | 19.731         | 0.022     | 38.200      | 413.300                            | 261.191                                | 0.021                     | 0.005                          | 683.745                             | 17.308                                 |
| Fm2_RU      | 156.767        | 166.908         | 19.913         | 0.019     | 40.300      | 429.200                            | 214.926                                | 0.115                     | 0.007                          | 533.314                             | 13.500                                 |
| Fm3_AL2     | 172.556        | 151.955         | 21.151         | 0.021     | 14.600      | 451.600                            | 148.104                                | 0.333                     | 0.008                          | 1014.414                            | 25.678                                 |
| Fm3_AL3     | 140.226        | 155.535         | 23.718         | 0.017     | 31.700      | 406.000                            | 167.240                                | 0.282                     | 0.008                          | 527.571                             | 13.354                                 |
| Fm3_HO      | 162.030        | 170.921         | 24.275         | 0.019     | 36.400      | 438.700                            | 203.082                                | 0.036                     | 0.005                          | 557.917                             | 14.123                                 |
| Fm3_DB      | 160.526        | 168.637         | 22.510         | 0.020     | 38.700      | 428.500                            | 189.067                                | 0.039                     | 0.005                          | 488.546                             | 12.367                                 |
| Fm3_RU      | 156.767        | 166.908         | 19.913         | 0.019     | 35.600      | 419.000                            | 227.568                                | 0.049                     | 0.005                          | 639.237                             | 16.181                                 |

20 **Table S2.** Bulk carbon composition of each sample. Columns show sample name, total sample weight (mg), total carbon content (TC, %), total organic carbon (TOC, %), total inorganic carbon released at 900 °C (TIC, %), organic carbon released at 400 °C (TOC<sub>400</sub>, %), and residual oxidisable carbon (ROC, %).

| <b>Name</b> | <b>Weigh (mg)</b> | <b>TC (%)</b> | <b>TOC (%)</b> | <b>TIC (%)</b> |
|-------------|-------------------|---------------|----------------|----------------|
| Fm2 AL      | 31.500            | 16.646        | 16.297         | 0.349          |
| Fm2 HO1     | 79.700            | 1.143         | 1.028          | 0.115          |
| Fm2 HO2     | 64.800            | 1.114         | 0.984          | 0.131          |
| Fm2 PL      | 54.100            | 1.404         | 1.252          | 0.152          |
| Fm2 RU      | 55.600            | 1.473         | 1.304          | 0.168          |
| Fm3 AL2     | 40.300            | 7.575         | 7.276          | 0.299          |
| Fm3 AL3     | 39.900            | 3.691         | 3.411          | 0.280          |
| Fm3 HO      | 61.700            | 1.297         | 1.153          | 0.144          |
| Fm3 DB      | 61.600            | 1.301         | 1.158          | 0.144          |
| Fm3 RU      | 64.200            | 1.585         | 1.439          | 0.146          |
| CB_AL1      | 40.200            | 1.857         | 1.646          | 0.210          |
| CB_AL2      | 44.000            | 3.708         | 3.499          | 0.209          |
| CB_AL3      | 45.700            | 2.700         | 2.500          | 0.200          |
| CB_AL4      | 41.600            | 2.094         | 1.880          | 0.215          |
| CB_HO       | 64.600            | 1.316         | 1.174          | 0.142          |
| CB_DB       | 55.400            | 1.656         | 1.499          | 0.157          |
| CB_RU       | 59.200            | 1.569         | 1.422          | 0.147          |
| SF_AL       | 59.500            | 1.952         | 1.793          | 0.159          |
| SF_HO       | 60.400            | 1.444         | 1.291          | 0.153          |
| SF_DB       | 72.900            | 1.262         | 1.139          | 0.123          |
| SF_RU       | 60.300            | 1.495         | 1.349          | 0.146          |

25 **Table S3.** Summary of ORO–AMS measurements for all samples and thermal windows. Columns show: sample ID, thermal window (°C), oxidation start time ( $t_0$ , s), oxidation end time ( $t_f$ , s), carbon mass released per thermal window ( $\mu\text{g}$ ) with associated uncertainty ( $\pm \mu\text{g}$ ), fraction modern radiocarbon ( $F^{14}\text{C}$ ) with standard deviation ( $\pm$ ), proportional contribution to total carbon release (fraction), mean activation energy ( $E$ ,  $\text{kJ mol}^{-1}$ ) with standard deviation ( $\pm \text{kJ mol}^{-1}$ ), and stable carbon isotope composition ( $\delta^{13}\text{C}$ , ‰).

| Sample  | Temperature Window (°C) | $t_0$ (s) | $t_f$ (s) | Mass thermal window ( $\mu\text{g}$ ) | Mass error ( $\pm \mu\text{g}$ ) | $F^{14}\text{C}$ | $F^{14}\text{C}$ std ( $\pm$ ) | fraction | E (kJ/mol) | E std. ( $\pm \text{kJ/mol}$ ) |
|---------|-------------------------|-----------|-----------|---------------------------------------|----------------------------------|------------------|--------------------------------|----------|------------|--------------------------------|
| Fm2_AL  | 150-240                 | 1385      | 2532      | 74.891                                | 1.896                            | 0.725            | 0.008                          | 1        | 124        | 6                              |
| Fm2_AL  | 240-300                 | 2533      | 3435      | 251.496                               | 6.366                            | 0.713            | 0.008                          | 2        | 134        | 7                              |
| Fm2_AL  | 300-350                 | 3436      | 4189      | 282.838                               | 7.159                            | 0.672            | 0.008                          | 3        | 146        | 7                              |
| Fm2_AL  | 350-400                 | 4190      | 4955      | 339.519                               | 8.594                            | 0.708            | 0.008                          | 4        | 158        | 6                              |
| Fm2_AL  | 400-455                 | 4956      | 5793      | 207.709                               | 5.258                            | 0.729            | 0.008                          | 5        | 167        | 7                              |
| Fm2_AL  | 455-510                 | 5794      | 6632      | 76.437                                | 1.935                            | 0.699            | 0.007                          | 6        | 180        | 6                              |
| Fm2_AL  | 510-600                 | 6633      | 8023      | 20.073                                | 0.508                            | 0.625            | 0.007                          | 7        | 195        | 8                              |
| Fm2_AL  | 600-900                 | 8024      | 10031     | 0.457                                 | 0.012                            | NA               | NA                             | 8        | 205        | 2                              |
| Fm2_HO1 | 150-240                 | 1359      | 2508      | 5.074                                 | 0.128                            | 0.262            | 0.005                          | 1        | 130        | 6                              |
| Fm2_HO1 | 240-300                 | 2509      | 3414      | 48.510                                | 1.228                            | 0.205            | 0.004                          | 2        | 136        | 7                              |
| Fm2_HO1 | 300-350                 | 3415      | 4179      | 88.143                                | 2.231                            | 0.139            | 0.003                          | 3        | 147        | 7                              |
| Fm2_HO1 | 350-400                 | 4180      | 4935      | 105.293                               | 2.665                            | 0.107            | 0.003                          | 4        | 157        | 7                              |
| Fm2_HO1 | 400-455                 | 4936      | 5772      | 84.113                                | 2.129                            | 0.096            | 0.003                          | 5        | 171        | 9                              |
| Fm2_HO1 | 455-510                 | 5773      | 6614      | 77.528                                | 1.962                            | 0.091            | 0.003                          | 6        | 184        | 7                              |
| Fm2_HO1 | 510-600                 | 6615      | 8009      | 59.805                                | 1.514                            | 0.102            | 0.004                          | 7        | 197        | 7                              |
| Fm2_HO1 | 600-900                 | 8010      | 9824      | 3.061                                 | 0.078                            | NA               | NA                             | 8        | 208        | 3                              |
| Fm2_HO2 | 150-240                 | 1358      | 2485      | 4.287                                 | 0.109                            | 0.209            | 0.005                          | 1        | 132        | 6                              |
| Fm2_HO2 | 240-300                 | 2486      | 3401      | 59.748                                | 1.512                            | 0.127            | 0.004                          | 2        | 137        | 7                              |
| Fm2_HO2 | 300-350                 | 3402      | 4154      | 119.813                               | 3.033                            | 0.079            | 0.003                          | 3        | 148        | 7                              |
| Fm2_HO2 | 350-400                 | 4155      | 4919      | 179.549                               | 4.545                            | 0.042            | 0.002                          | 4        | 158        | 6                              |
| Fm2_HO2 | 400-455                 | 4920      | 5758      | 137.144                               | 3.472                            | 0.052            | 0.002                          | 5        | 168        | 7                              |
| Fm2_HO2 | 455-510                 | 5759      | 6598      | 75.094                                | 1.901                            | 0.088            | 0.003                          | 6        | 184        | 7                              |
| Fm2_HO2 | 510-600                 | 6599      | 8007      | 44.609                                | 1.129                            | 0.123            | 0.004                          | 7        | 194        | 6                              |
| Fm2_HO2 | 600-900                 | 8008      | 10787     | 0.137                                 | 0.004                            | NA               | NA                             | 8        | 204        | 2                              |
| Fm2_PL  | 150-240                 | 1468      | 2606      | 8.994                                 | 0.228                            | 0.105            | 0.003                          | 1        | 129        | 6                              |
| Fm2_PL  | 240-300                 | 2607      | 3517      | 76.160                                | 1.928                            | 0.045            | 0.002                          | 2        | 136        | 7                              |
| Fm2_PL  | 300-350                 | 3518      | 4261      | 138.081                               | 3.495                            | 0.021            | 0.002                          | 3        | 147        | 7                              |
| Fm2_PL  | 350-400                 | 4262      | 5022      | 160.359                               | 4.059                            | 0.016            | 0.001                          | 4        | 157        | 7                              |
| Fm2_PL  | 400-455                 | 5023      | 5867      | 123.992                               | 3.139                            | 0.015            | 0.001                          | 5        | 171        | 8                              |
| Fm2_PL  | 455-510                 | 5868      | 6721      | 108.077                               | 2.736                            | 0.012            | 0.001                          | 6        | 184        | 7                              |
| Fm2_PL  | 510-600                 | 6722      | 8112      | 68.081                                | 1.723                            | 0.021            | 0.001                          | 7        | 195        | 7                              |
| Fm2_PL  | 600-900                 | 8113      | 10365     | 1.625                                 | 0.041                            | NA               | NA                             | 8        | 206        | 3                              |
| Fm2_RU  | 150-240                 | 1472      | 2601      | 3.575                                 | 0.091                            | 0.239            | 0.006                          | 1        | 132        | 6                              |
| Fm2_RU  | 240-300                 | 2602      | 3500      | 45.649                                | 1.156                            | 0.192            | 0.004                          | 2        | 137        | 7                              |
| Fm2_RU  | 300-350                 | 3501      | 4278      | 92.559                                | 2.343                            | 0.131            | 0.003                          | 3        | 147        | 7                              |
| Fm2_RU  | 350-400                 | 4279      | 5036      | 111.741                               | 2.829                            | 0.108            | 0.003                          | 4        | 158        | 7                              |
| Fm2_RU  | 400-455                 | 5037      | 5876      | 114.933                               | 2.909                            | 0.093            | 0.003                          | 5        | 171        | 8                              |
| Fm2_RU  | 455-510                 | 5877      | 6717      | 99.387                                | 2.516                            | 0.106            | 0.003                          | 6        | 183        | 7                              |
| Fm2_RU  | 510-600                 | 6718      | 8108      | 65.469                                | 1.657                            | 0.097            | 0.003                          | 7        | 197        | 8                              |
| Fm2_RU  | 600-900                 | 8109      | 10204     | 4.611                                 | 0.117                            | NA               | NA                             | 8        | 210        | 4                              |



| Sample  | Temperature Window (°C) | t0 (s) | tf (s) | Mass thermal window (µg) | Mass error (± µg) | F <sup>14</sup> C | F <sup>14</sup> C std (±) | fraction | E (kJ/mol) | E std. (± kJ/mol) |
|---------|-------------------------|--------|--------|--------------------------|-------------------|-------------------|---------------------------|----------|------------|-------------------|
| Fm3_AL2 | 150-240                 | 1566   | 2702   | 106.600                  | 2.698             | 0.337             | 0.005                     | 1        | 121        | 6                 |
| Fm3_AL2 | 240-300                 | 2703   | 3614   | 231.053                  | 5.849             | 0.339             | 0.007                     | 2        | 133        | 7                 |
| Fm3_AL2 | 300-350                 | 3615   | 4367   | 188.344                  | 4.768             | 0.324             | 0.006                     | 3        | 145        | 7                 |
| Fm3_AL2 | 350-400                 | 4368   | 5135   | 144.903                  | 3.668             | 0.329             | 0.006                     | 4        | 159        | 9                 |
| Fm3_AL2 | 400-455                 | 5136   | 5966   | 203.368                  | 5.148             | 0.341             | 0.005                     | 5        | 171        | 6                 |
| Fm3_AL2 | 455-510                 | 5967   | 6819   | 113.911                  | 2.883             | 0.328             | 0.005                     | 6        | 179        | 6                 |
| Fm3_AL2 | 510-600                 | 6820   | 8255   | 26.235                   | 0.664             | 0.327             | 0.006                     | 7        | 193        | 6                 |
| Fm3_AL2 | 600-900                 | NA     | NA     | 0.000                    | 0.000             | NA                | NA                        | 8        | 0          | 0                 |
|         |                         |        |        |                          |                   |                   |                           |          |            |                   |
| Fm3_AL3 | 150-240                 | 1485   | 2625   | 43.726                   | 1.107             | 0.309             | 0.006                     | 1        | 122        | 7                 |
| Fm3_AL3 | 240-300                 | 2626   | 3536   | 112.809                  | 2.856             | 0.294             | 0.005                     | 2        | 133        | 7                 |
| Fm3_AL3 | 300-350                 | 3537   | 4291   | 101.437                  | 2.568             | 0.268             | 0.005                     | 3        | 145        | 7                 |
| Fm3_AL3 | 350-400                 | 4292   | 5056   | 85.077                   | 2.154             | 0.295             | 0.005                     | 4        | 158        | 8                 |
| Fm3_AL3 | 400-455                 | 5057   | 5897   | 90.473                   | 2.290             | 0.271             | 0.005                     | 5        | 171        | 7                 |
| Fm3_AL3 | 455-510                 | 5898   | 6739   | 61.264                   | 1.551             | 0.272             | 0.005                     | 6        | 182        | 7                 |
| Fm3_AL3 | 510-600                 | 6740   | 8055   | 32.785                   | 0.830             | 0.267             | 0.007                     | 7        | 197        | 8                 |
| Fm3_AL3 | 600-900                 | 8056   | 9690   | 7.877                    | 0.199             | NA                | NA                        | 8        | 222        | 10                |
|         |                         |        |        |                          |                   |                   |                           |          |            |                   |
| Fm3_HO  | 150-240                 | 1714   | 2840   | 5.925                    | 0.150             | 0.106             | 0.004                     | 1        | 129        | 6                 |
| Fm3_HO  | 240-300                 | 2841   | 3763   | 49.912                   | 1.263             | 0.074             | 0.003                     | 2        | 136        | 7                 |
| Fm3_HO  | 300-350                 | 3764   | 4513   | 87.868                   | 2.224             | 0.049             | 0.002                     | 3        | 147        | 7                 |
| Fm3_HO  | 350-400                 | 4514   | 5267   | 112.679                  | 2.852             | 0.038             | 0.002                     | 4        | 158        | 7                 |
| Fm3_HO  | 400-455                 | 5268   | 6111   | 108.595                  | 2.749             | 0.031             | 0.002                     | 5        | 170        | 8                 |
| Fm3_HO  | 455-510                 | 6112   | 6958   | 92.931                   | 2.352             | 0.017             | 0.002                     | 6        | 185        | 8                 |
| Fm3_HO  | 510-600                 | 6959   | 8341   | 100.007                  | 2.531             | 0.023             | 0.002                     | 7        | 199        | 8                 |
| Fm3_HO  | 600-900                 | 8342   | 10665  | 26.833                   | 0.679             | NA                | NA                        | 8        | 223        | 13                |
|         |                         |        |        |                          |                   |                   |                           |          |            |                   |
| Fm3_DB  | 150-240                 | 1558   | 2703   | 4.864                    | 0.123             | 0.133             | 0.004                     | 1        | 130        | 6                 |
| Fm3_DB  | 240-300                 | 2704   | 3595   | 43.497                   | 1.101             | 0.084             | 0.003                     | 2        | 136        | 7                 |
| Fm3_DB  | 300-350                 | 3596   | 4356   | 82.889                   | 2.098             | 0.050             | 0.002                     | 3        | 147        | 7                 |
| Fm3_DB  | 350-400                 | 4357   | 5119   | 105.309                  | 2.666             | 0.038             | 0.002                     | 4        | 158        | 7                 |
| Fm3_DB  | 400-455                 | 5120   | 5957   | 94.050                   | 2.381             | 0.028             | 0.002                     | 5        | 170        | 8                 |
| Fm3_DB  | 455-510                 | 5958   | 6806   | 80.504                   | 2.038             | 0.024             | 0.002                     | 6        | 185        | 8                 |
| Fm3_DB  | 510-600                 | 6807   | 8193   | 77.433                   | 1.960             | 0.025             | 0.002                     | 7        | 198        | 8                 |
| Fm3_DB  | 600-900                 | 8194   | 10508  | 13.925                   | 0.352             | NA                | NA                        | 8        | 218        | 11                |
|         |                         |        |        |                          |                   |                   |                           |          |            |                   |
| Fm3_RU  | 150-240                 | 1424   | 2564   | 15.129                   | 0.383             | 0.116             | 0.003                     | 1        | 126        | 6                 |
| Fm3_RU  | 240-300                 | 2565   | 3481   | 82.297                   | 2.083             | 0.071             | 0.003                     | 2        | 135        | 7                 |
| Fm3_RU  | 300-350                 | 3482   | 4241   | 128.834                  | 3.261             | 0.050             | 0.003                     | 3        | 147        | 7                 |
| Fm3_RU  | 350-400                 | 4242   | 4987   | 137.515                  | 3.481             | 0.043             | 0.002                     | 4        | 157        | 7                 |
| Fm3_RU  | 400-455                 | 4988   | 5833   | 112.279                  | 2.842             | 0.043             | 0.002                     | 5        | 171        | 8                 |
| Fm3_RU  | 455-510                 | 5834   | 6677   | 98.011                   | 2.481             | 0.042             | 0.002                     | 6        | 183        | 7                 |
| Fm3_RU  | 510-600                 | 6678   | 8065   | 65.172                   | 1.650             | 0.041             | 0.002                     | 7        | 197        | 8                 |
| Fm3_RU  | 600-900                 | 8066   | 10379  | 7.000                    | 0.177             | NA                | NA                        | 8        | 215        | 11                |

**Table S4.** Summary of identified peaks from Py–GCMS analyses across thermal windows (150–850 °C) for Fm2 and Fm3 samples. See separate file PyroGCMS\_Fm2\_Fm3\_150\_850.csv. Columns include Source File, Sample, Peak Number, Retention Time, Peak Area, Peak Area [%], Target (OpenChrom identification), and Classifier (compound group).

Supplementary figures

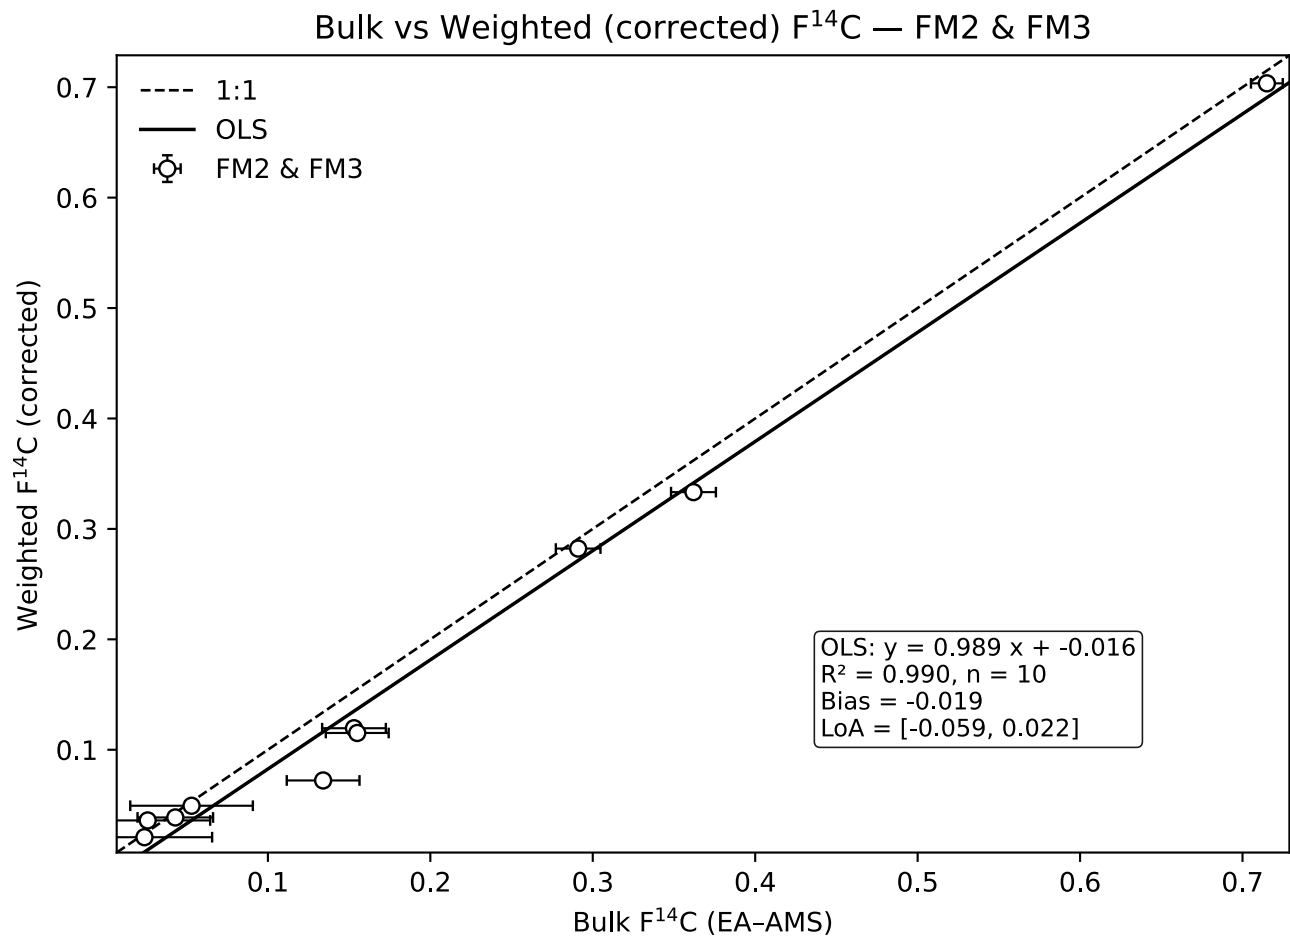

**Figure S1.** Comparison between thermally integrated (weighted) and bulk F<sup>14</sup>C values for thaw-slump samples from FM2 and FM3 both in circles Bulk F<sup>14</sup>C were taken from Bröder et al. (2021). The 1:1 line (grey dashed) marks perfect agreement. Weighted values closely reproduce bulk F<sup>14</sup>C measurements (OLS = 0.989 x – 0.016; R<sup>2</sup> = 0.99), confirming that the thermal integration approach captures the bulk radiocarbon signal within analytical uncertainty.

Comparison of ROC/TOC ratios derived from SoliTOC and ORO–AMS reveals consistent trends across geomorphic features, validating the use of this metric for assessing OM thermal stability. In both datasets, PF, DB, and RU samples exhibit moderate

45 to high ROC/TOC values, indicating a dominance of thermally resistant carbon in remobilised and permafrost compartments. In contrast, AL samples — especially from FM2 — display lower ROC/TOC ratios (e.g., 0.24 for SoliTOC and 0.12 for ORO–AMS), reflecting greater contributions from labile and biologically active OM. While absolute values differ, typically with ORO–AMS reporting slightly lower ROC/TOC ratios, the relative order remains consistent across sites. The difference arises because ORO–AMS resolves oxidation continuously across the thermal spectrum, whereas SoliTOC defines discrete  
50 temperature intervals. This finer resolution leads to what was previously described as “more granular thermal fractionation,” meaning that ORO–AMS captures partial oxidation within the 400 °C boundary rather than assigning all remaining carbon above this point to the ROC fraction.

The coherence between these two independent methods therefore primarily demonstrates analytical comparability — that carbon oxidised below 400 °C in one system tends to do so in the other — rather than implying direct geomorphic control.

55

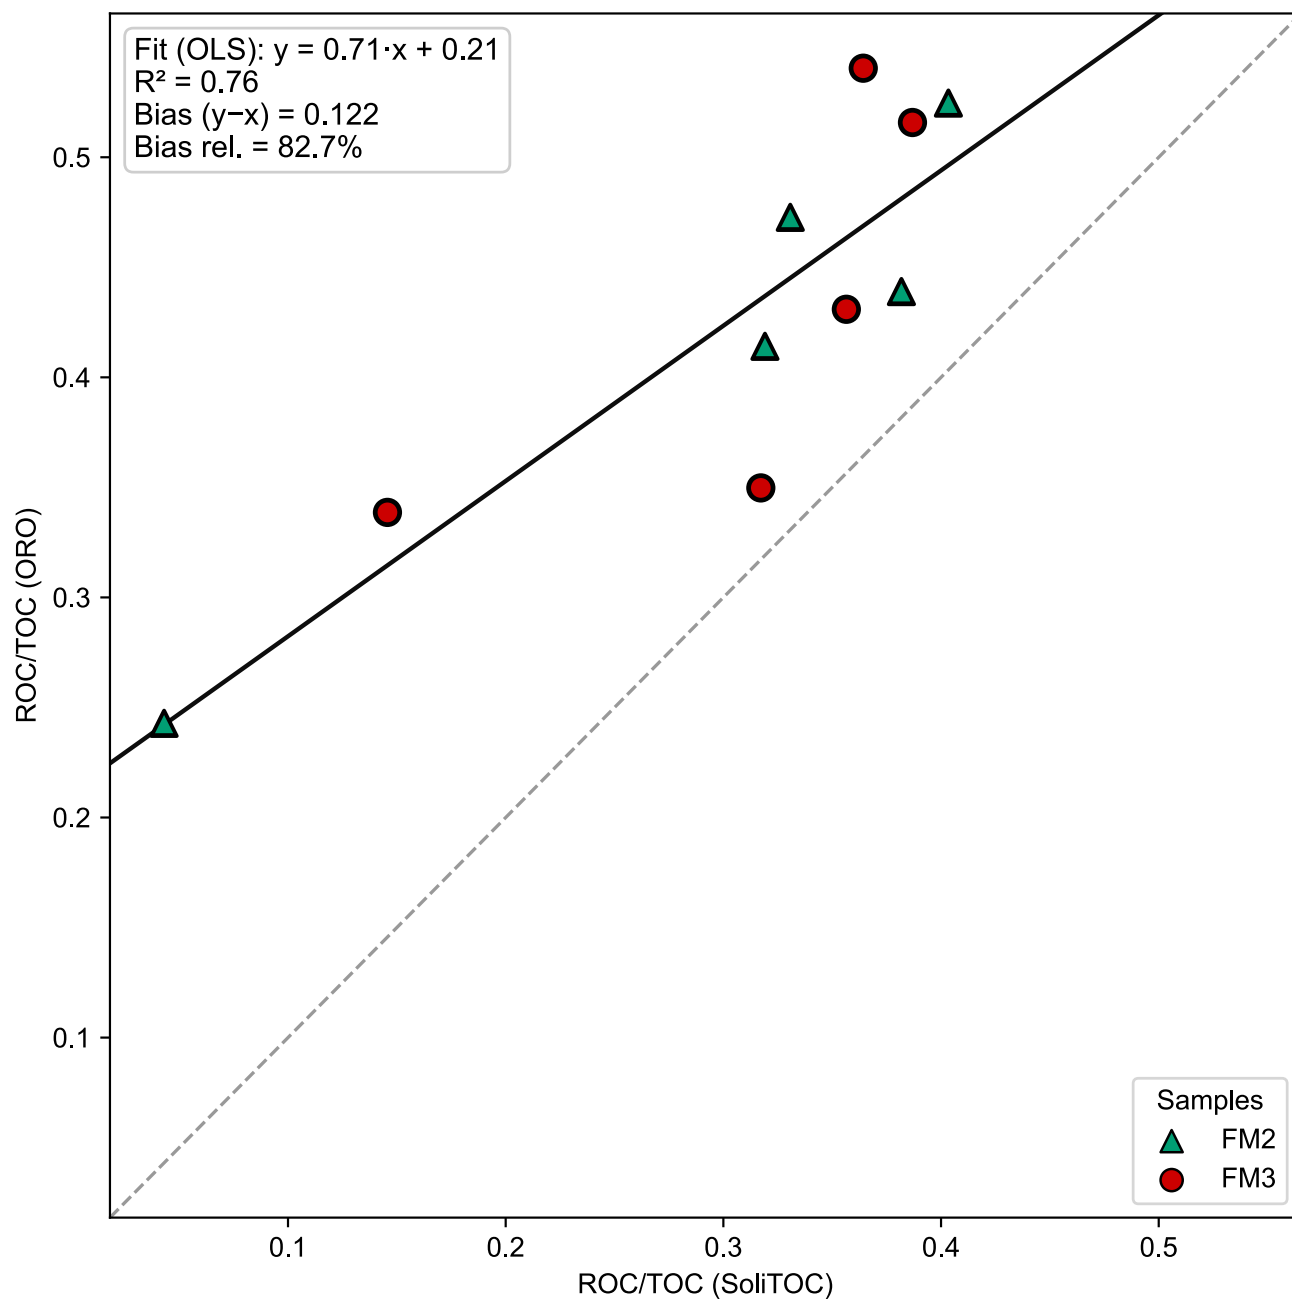

**Figure S2.** Cross-plot comparison of ROC/TOC ratios obtained from SoliTOC and ORO–AMS analyses for thaw-slump samples from FM2 (green triangles) and FM3 (red circles). The 1:1 line (grey dashed) indicates perfect agreement. A consistent offset is observed, with ORO–AMS reporting systematically higher ROC/TOC values (slope = 0.71,  $R^2 = 0.76$ , bias  $\approx 0.12$ ), reflecting methodological differences between continuous and stepped combustion.

However, when interpreted together with thermogram and molecular data, the pattern still supports a geomorphic gradient in OM reactivity: thermally stable carbon accumulates in PF, DB, and RU, while the AL retains fresher, more reactive OM influenced by vegetation cover, thaw depth, and cryogenic disturbance. Differences in absolute ROC/TOC ratios between  
65 SoliTOC and ORO–AMS are largely methodological. The continuous ramping approach of ORO–AMS and the discrete temperature steps of SoliTOC partition intermediate thermal fractions differently, leading to systematic offsets in ROC/TOC values. In particular, intermediate-temperature carbon fractions may be assigned differently between methods, resulting in higher apparent ROC/TOC values in ORO–AMS compared to SoliTOC. This offset ( $\sim 0.2$  on average in our dataset) is consistent with inter-method differences reported in similar comparative studies. These method-inherent biases highlight the  
70 value of using multiple thermal approaches to constrain OM reactivity and underscore the complementarity of SoliTOC and ORO–AMS.

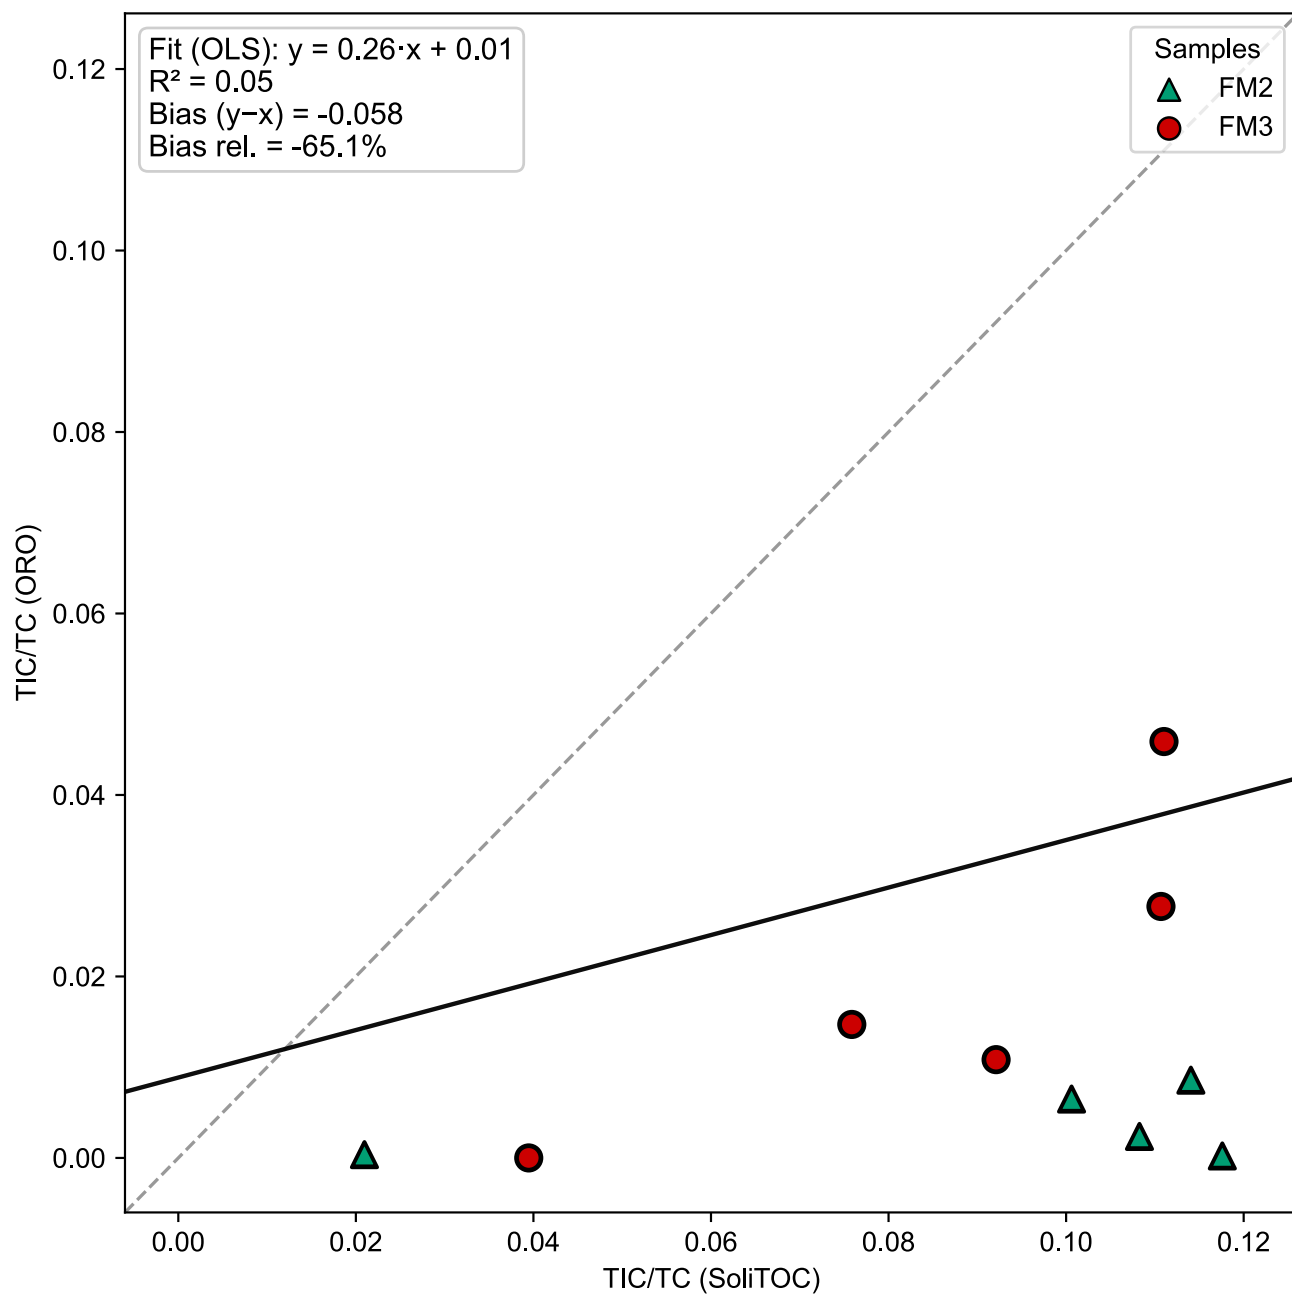

**Figure S3.** Cross-plot comparison of TIC/TC ratios obtained from SoliTOC and ORO analyses for thaw-slump samples from FM2 (green triangles) and FM3 (red circles). The 1:1 line (grey dashed) marks perfect agreement. Values show large scatter and no systematic 1:1 relationship (slope = 0.26,  $R^2 = 0.05$ , bias  $\approx -65.1$ ), indicating that TIC/TC is highly method-dependent. This reflects the very small carbon fraction oxidised  $>900$  °C and differences in operational temperature windows, integration procedures, and instrument sensitivity between SoliTOC and ORO.

80 The two metrics show poor agreement and substantial scatter relative to the 1:1 line, with a systematic tendency for ORO to  
yield lower TIC/TC values than SoliTOC. This directional bias reflects fundamental differences in how carbonate  
decomposition is achieved by the two instruments. SoliTOC relies on fixed isothermal holds between 600 and 900 °C, during  
which some high-temperature carbonates (e.g. Mg-rich or Fe-bearing phases) may not fully decompose, leading to  
underestimation of TIC. In contrast, ORO applies continuous high-temperature oxidation under pure O<sub>2</sub>, which more  
85 completely decomposes residual carbonates and produces larger TIC signals.

Superimposed on this directional offset is substantial scatter. Because TIC represents <1 % of total carbon after acidification,  
small variations in CO<sub>2</sub> yield, baseline subtraction, or signal integration translate into large relative differences when expressed  
as TIC/TC. The ORO detection chain is also more sensitive to minor adsorption, leaks, or memory effects than SoliTOC's  
90 direct TGA–IR configuration, further amplifying variability in this tail fraction. Together, these effects demonstrate that  
TIC/TC is strongly method-dependent and unsuitable for quantitative cross-method comparison.

By comparison, total organic carbon (TOC) measured by SoliTOC closely matches independently measured OC from  
elemental analysis (EA) (Fig. S4;  $R^2 = 0.99$ , slope = 1.00), confirming robust bulk carbon quantification. Total carbon estimates  
95 derived from ORO–AMS are also comparable to EA-OC values (Table S3), although agreement is less systematic because  
ORO-based values rely on mg-precision mass determination rather than direct carbon quantification. Consequently, inter-  
method interpretation is restricted to the more robust operational fractions (TOC<sub>400</sub> and ROC), which show consistent  
behaviour across techniques.

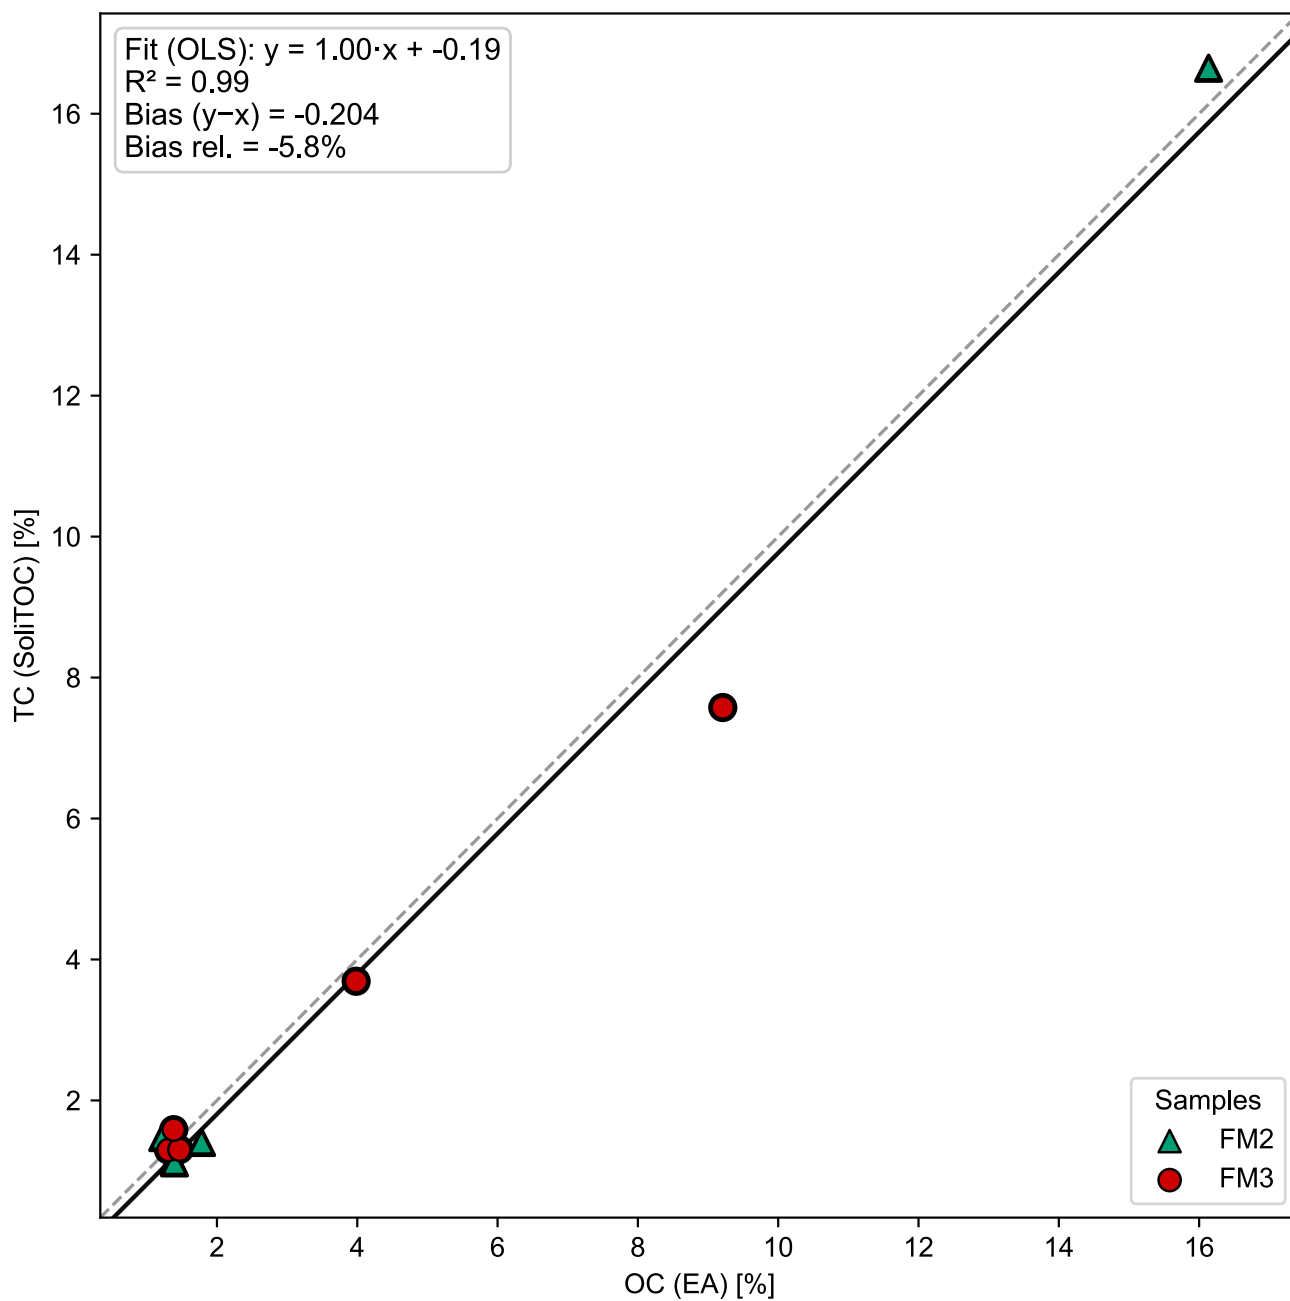

100 **Figure S4.** Cross-plot comparison of TC measured by SoliTOC and OC measured by elemental analysis (EA) for thaw-slump samples (Bröder et al., 2021) from FM2 (green triangles) and FM3 (red circles). The 1:1 line (grey dashed) indicates perfect agreement. TC and OC(EA) show near-identical values across samples (slope = 1.00,  $R^2 = 0.99$ , bias  $\approx -0.20$ ), confirming that



SoliTOC-derived total carbon closely matches independent EA-OC measurements after acidification and indicating robust quantification of the bulk organic carbon pool.

105

To verify the consistency of total organic carbon quantification across independent analytical methods, we compared TC values from SoliTOC with OC measurements obtained via elemental analysis (EA). All samples were acidified prior to both analyses, ensuring that measured carbon corresponds to organic carbon. The cross-plot (Fig. S4) shows excellent agreement between the two methods, with all samples falling close to the 1:1 line and a regression slope of  $\sim 1.00$  ( $R^2 = 0.99$ ). The small absolute bias ( $\approx -0.20$  %) indicates slightly lower TC values from SoliTOC relative to EA, but the deviation is within expected analytical uncertainty for low-mass permafrost samples. This strong correspondence demonstrates that SoliTOC reliably quantifies bulk organic carbon, and that downstream ratios ( $\text{TOC}_{400}/\text{TOC}$ ,  $\text{ROC}/\text{TOC}$ ) are not affected by methodological inconsistencies in total-carbon estimation.

110

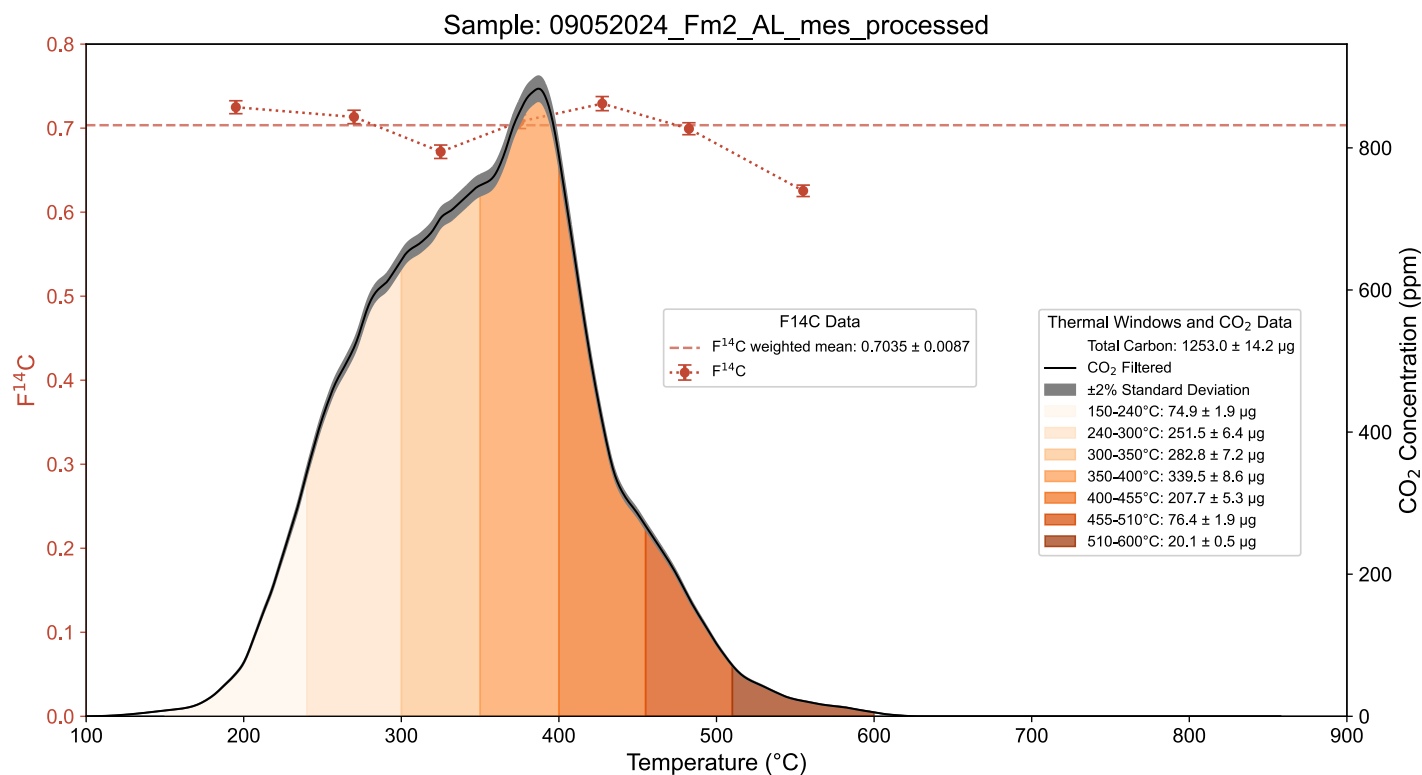

**Figures S5.** Thermogram of FM2-AL shows CO<sub>2</sub> release as a function of temperature for each sample, overlaid with corresponding F<sup>14</sup>C values across defined thermal windows. For each thermal window, the legends show the calculated carbon mass released (with associated error), the mass fraction (%), and the weighted F<sup>14</sup>C (with standard deviation). These data illustrate the relationship between carbon release dynamics, radiocarbon content, and the distribution of mass across the thermal profile.

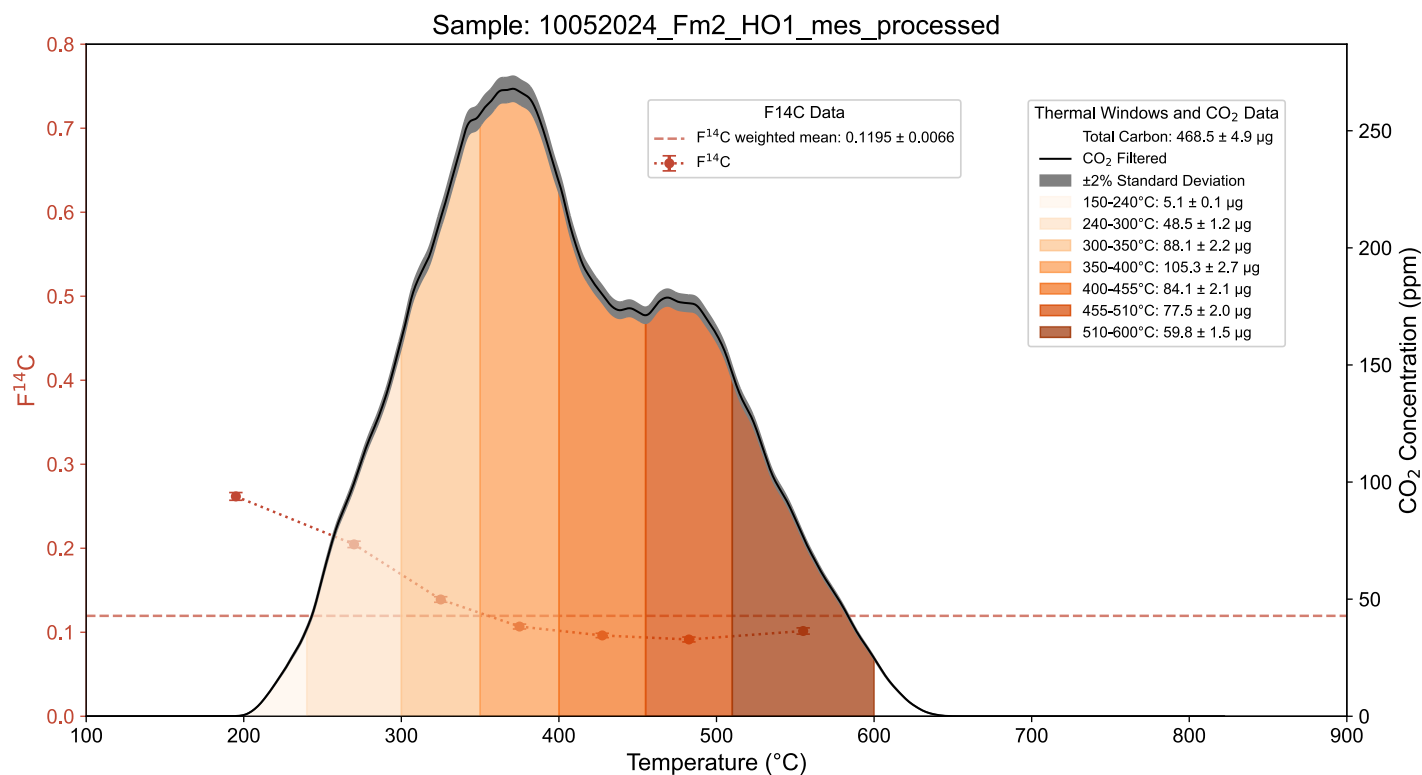

**Figures S6.** Thermogram of FM2-HO1 shows CO<sub>2</sub> release as a function of temperature for each sample, overlaid with corresponding F<sup>14</sup>C values across defined thermal windows. For each thermal window, the legends show the calculated carbon mass released (with associated error), the mass fraction (%), and the weighted F<sup>14</sup>C (with standard deviation). These data illustrate the relationship between carbon release dynamics, radiocarbon content, and the distribution of mass across the thermal profile.

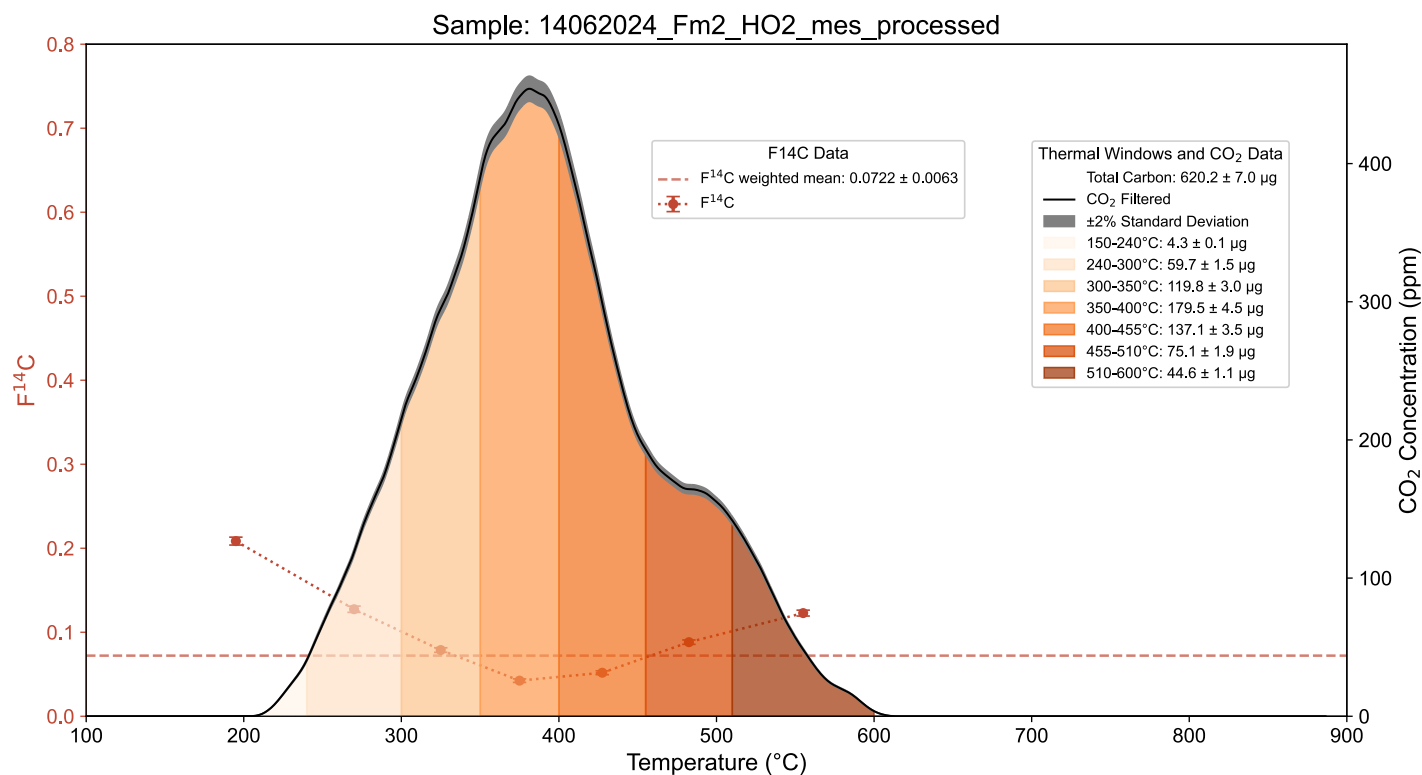

**Figures S7.** Thermogram of FM2-HO2 shows CO<sub>2</sub> release as a function of temperature for each sample, overlaid with corresponding F<sup>14</sup>C values across defined thermal windows. For each thermal window, the legends show the calculated carbon mass released (with associated error), the mass fraction (%), and the weighted F<sup>14</sup>C (with standard deviation). These data illustrate the relationship between carbon release dynamics, radiocarbon content, and the distribution of mass across the thermal profile.

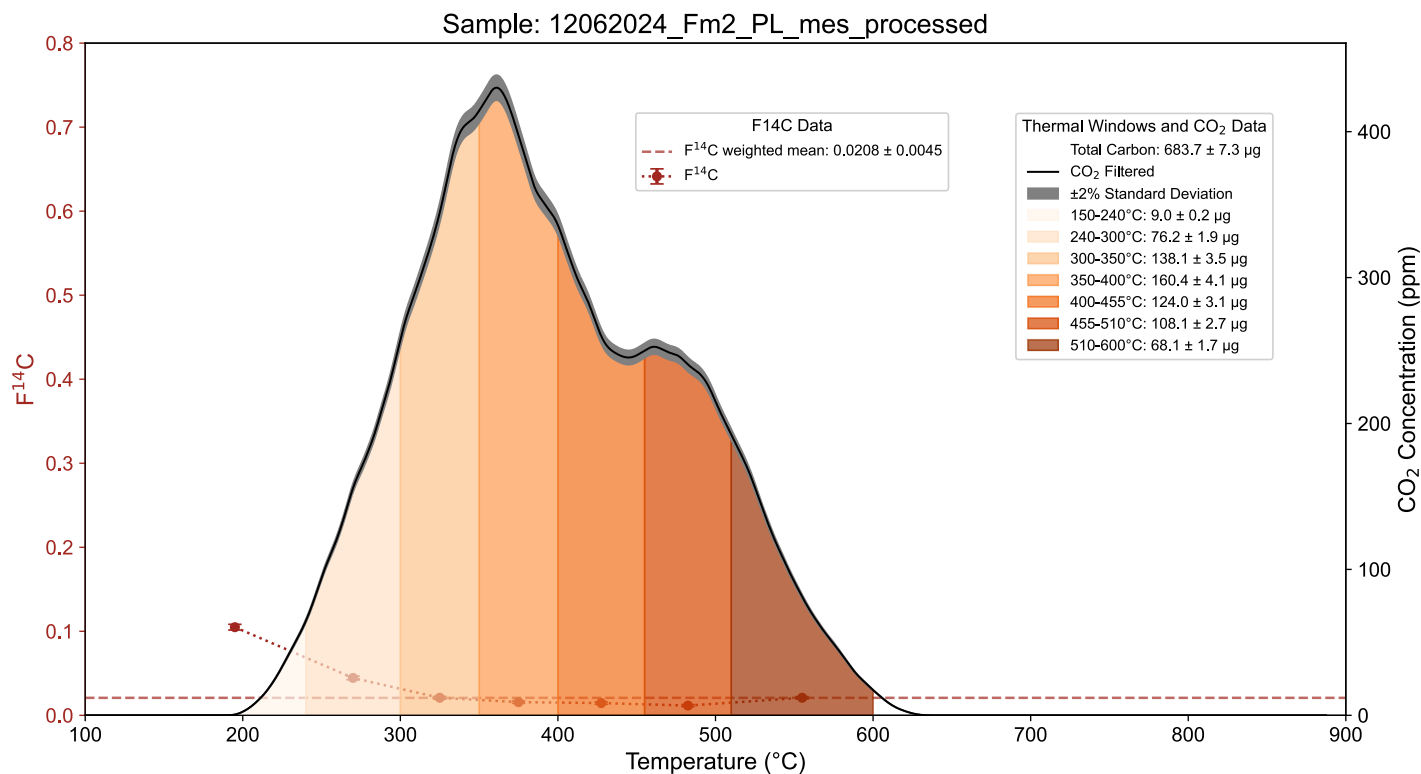

**Figures S8.** Thermogram of FM2-PL shows CO<sub>2</sub> release as a function of temperature for each sample, overlaid with corresponding F<sup>14</sup>C values across defined thermal windows. For each thermal window, the legends show the calculated carbon mass released (with associated error), the mass fraction (%), and the weighted F<sup>14</sup>C (with standard deviation). These data illustrate the relationship between carbon release dynamics, radiocarbon content, and the distribution of mass across the thermal profile.

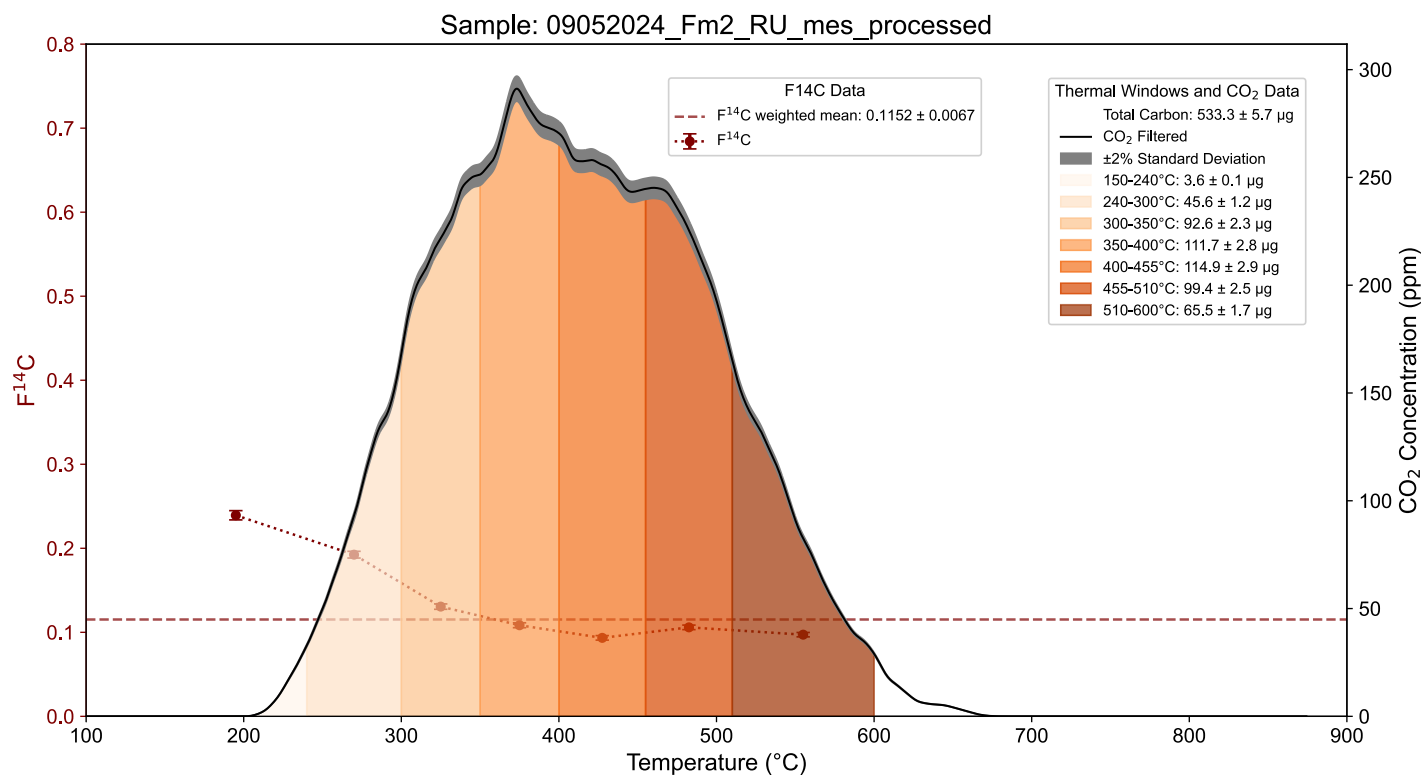

130 **Figures S9.** Thermogram of FM2-RU shows CO<sub>2</sub> release as a function of temperature for each sample, overlaid with corresponding F<sup>14</sup>C values across defined thermal windows. For each thermal window, the legends show the calculated carbon mass released (with associated error), the mass fraction (%), and the weighted F<sup>14</sup>C (with standard deviation). These data illustrate the relationship between carbon release dynamics, radiocarbon content, and the distribution of mass across the thermal profile.

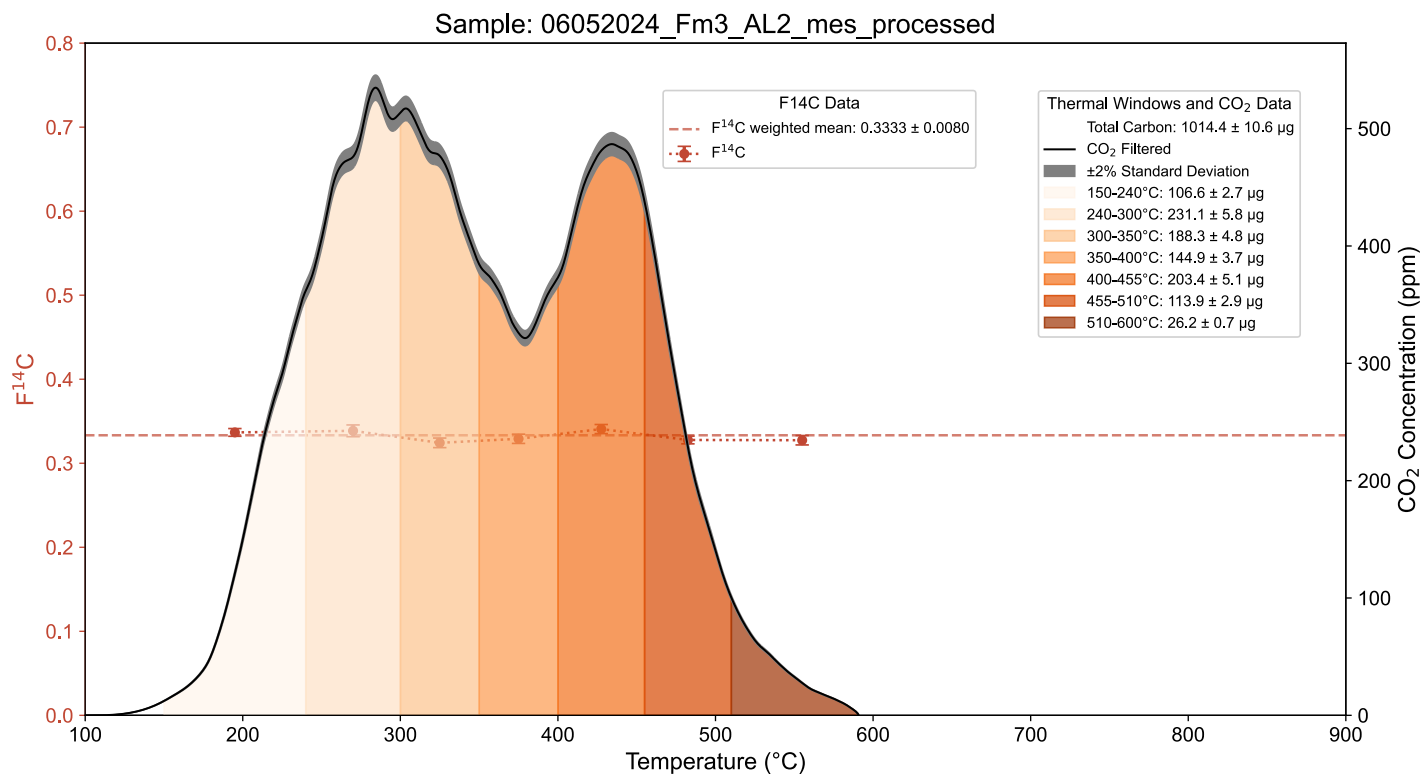

**Figures S10.** Thermogram of FM3-AL2 shows CO<sub>2</sub> release as a function of temperature for each sample, overlaid with corresponding F<sup>14</sup>C values across defined thermal windows. For each thermal window, the legends show the calculated carbon mass released (with associated error), the mass fraction (%), and the weighted F<sup>14</sup>C (with standard deviation). These data illustrate the relationship between carbon release dynamics, radiocarbon content, and the distribution of mass across the thermal profile.

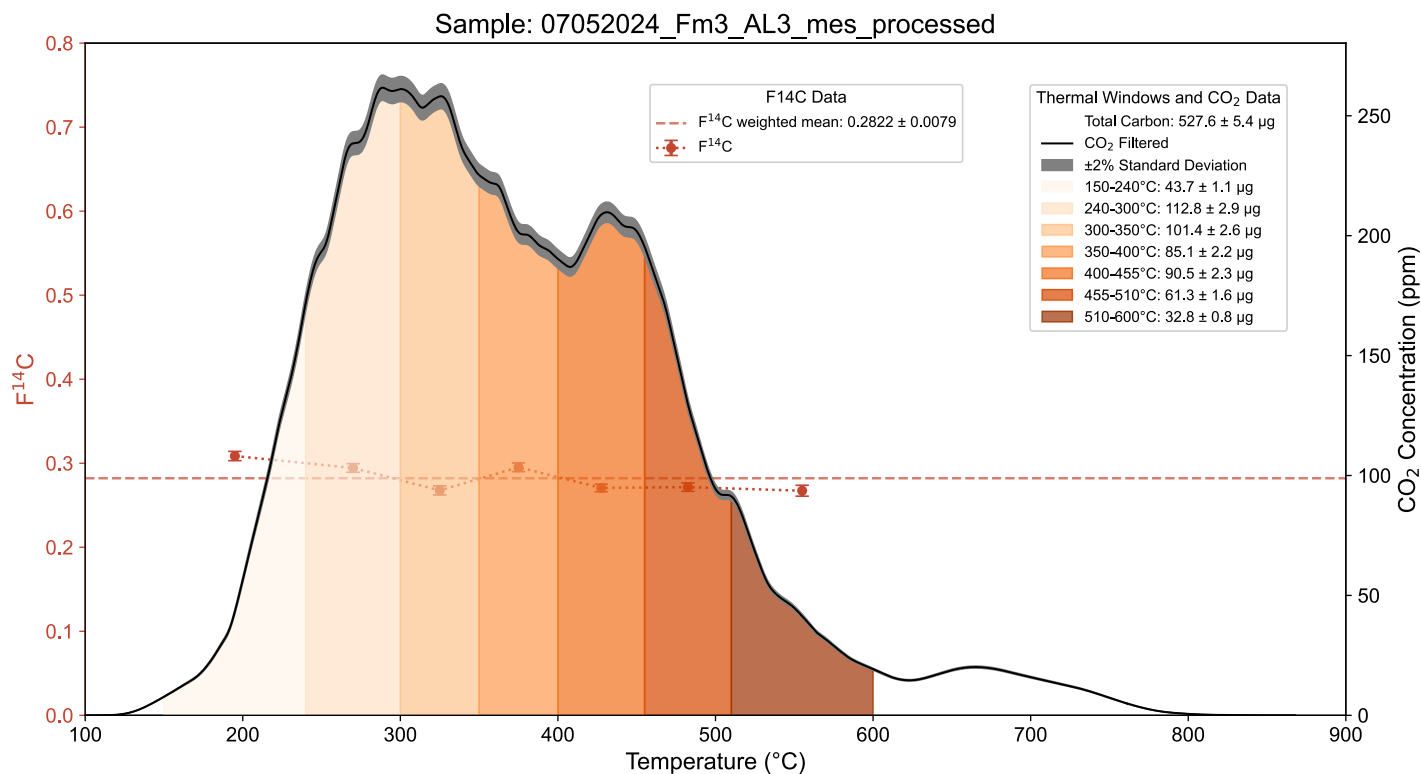

**Figures S11.** Thermogram of FM3-AL3 shows CO<sub>2</sub> release as a function of temperature for each sample, overlaid with corresponding F<sup>14</sup>C values across defined thermal windows. For each thermal window, the legends show the calculated carbon mass released (with associated error), the mass fraction (%), and the weighted F<sup>14</sup>C (with standard deviation). These data illustrate the relationship between carbon release dynamics, radiocarbon content, and the distribution of mass across the thermal profile.



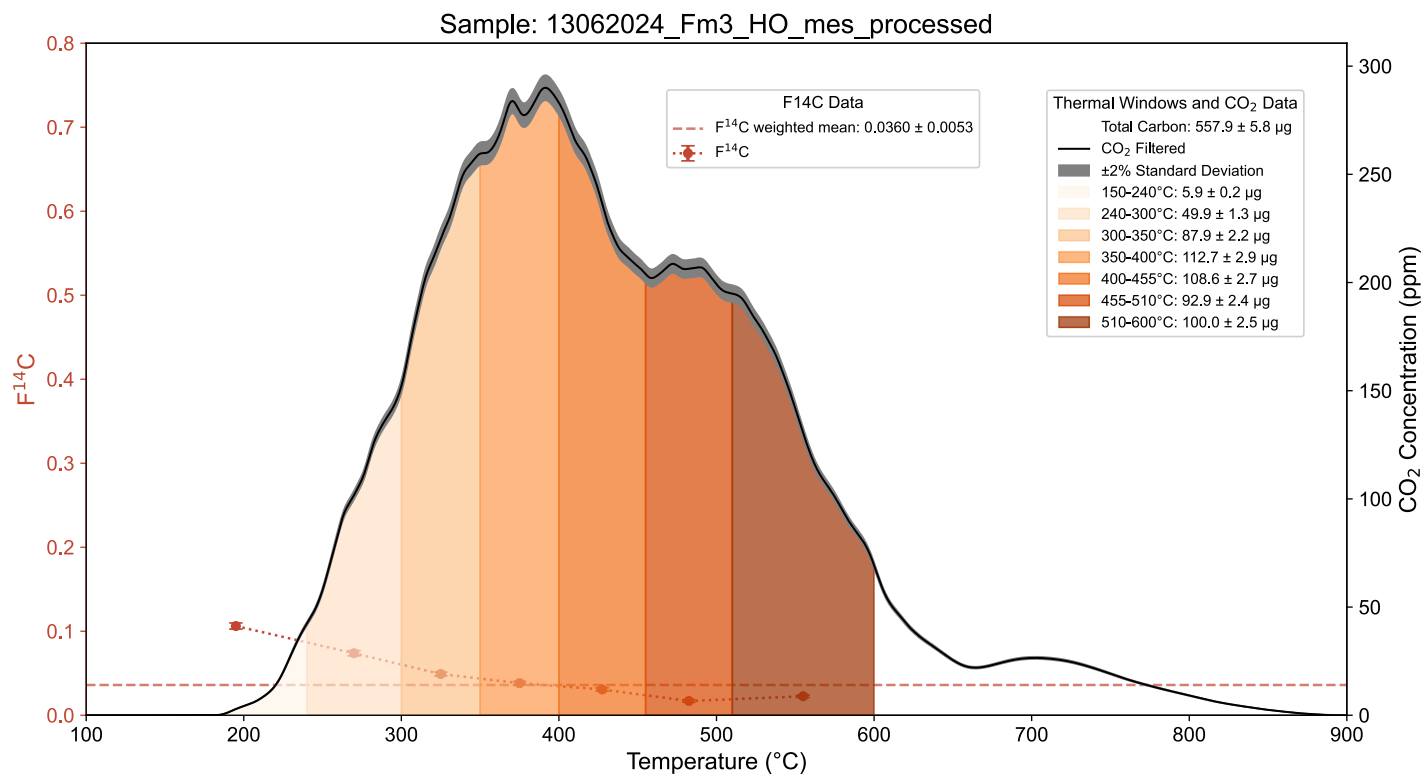

**Figures S12.** Thermogram of FM3-HO shows CO<sub>2</sub> release as a function of temperature for each sample, overlaid with corresponding F<sup>14</sup>C values across defined thermal windows. For each thermal window, the legends show the calculated carbon mass released (with associated error), the mass fraction (%), and the weighted F<sup>14</sup>C (with standard deviation). These data illustrate the relationship between carbon release dynamics, radiocarbon content, and the distribution of mass across the thermal profile.

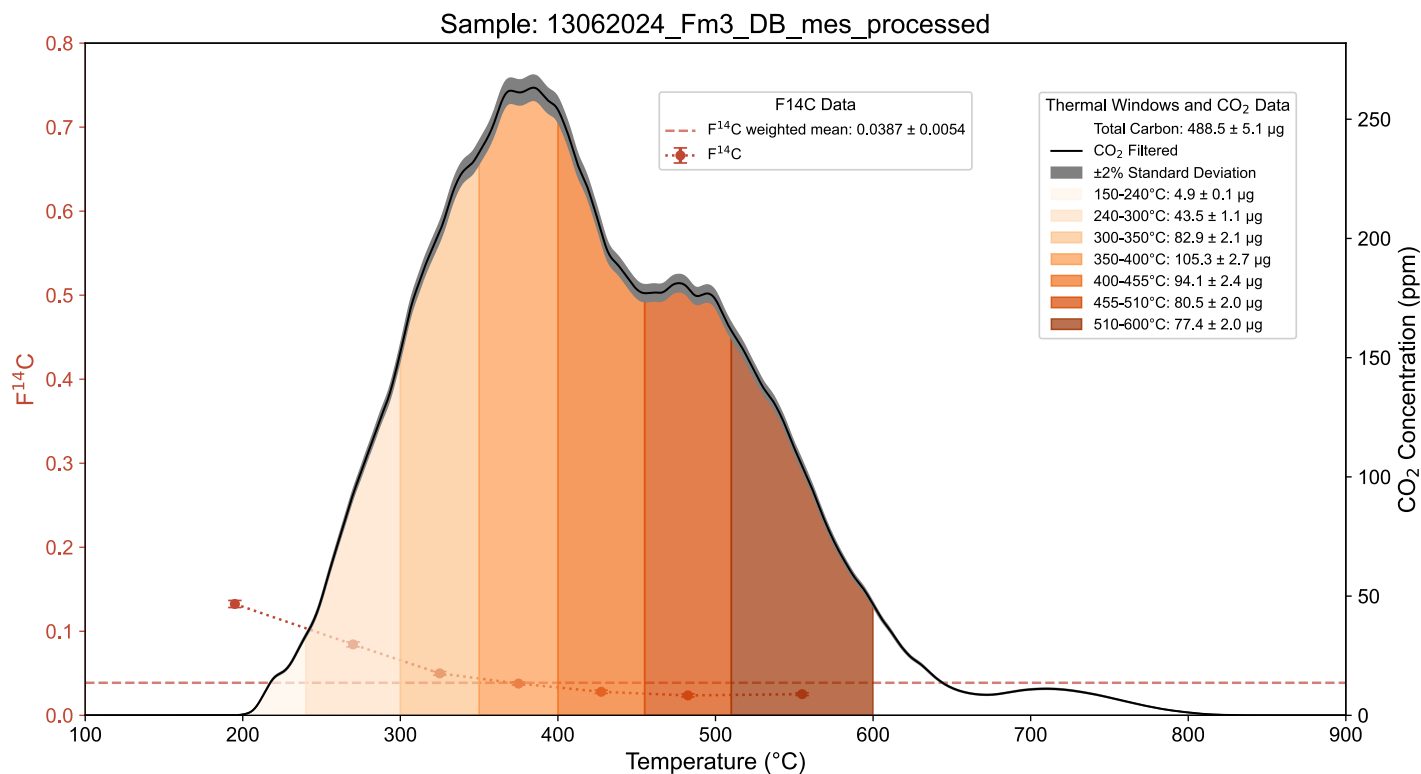

**Figures S13.** Thermogram of FM3-DB shows CO<sub>2</sub> release as a function of temperature for each sample, overlaid with corresponding F<sup>14</sup>C values across defined thermal windows. For each thermal window, the legends show the calculated carbon mass released (with associated error), the mass fraction (%), and the weighted F<sup>14</sup>C (with standard deviation). These data illustrate the relationship between carbon release dynamics, radiocarbon content, and the distribution of mass across the thermal profile.

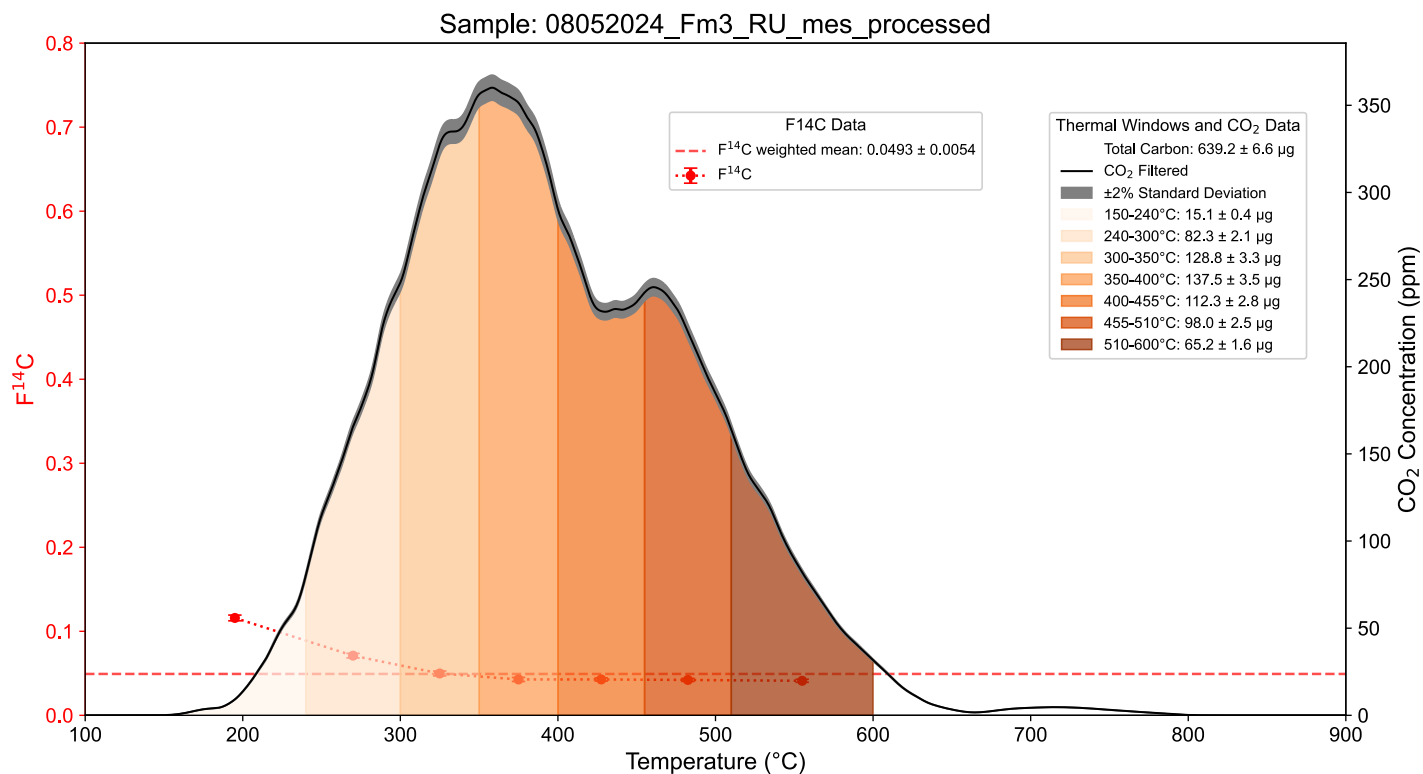

150 **Figures S14.** Thermogram of FM3-RU shows CO<sub>2</sub> release as a function of temperature for each sample, overlaid with corresponding F<sup>14</sup>C values across defined thermal windows. For each thermal window, the legends show the calculated carbon mass released (with associated error), the mass fraction (%), and the weighted F<sup>14</sup>C (with standard deviation). These data illustrate the relationship between carbon release dynamics, radiocarbon content, and the distribution of mass across the thermal profile.

# Compound-class proportions (stacked) with $F^{14}C$ (points) by sample type

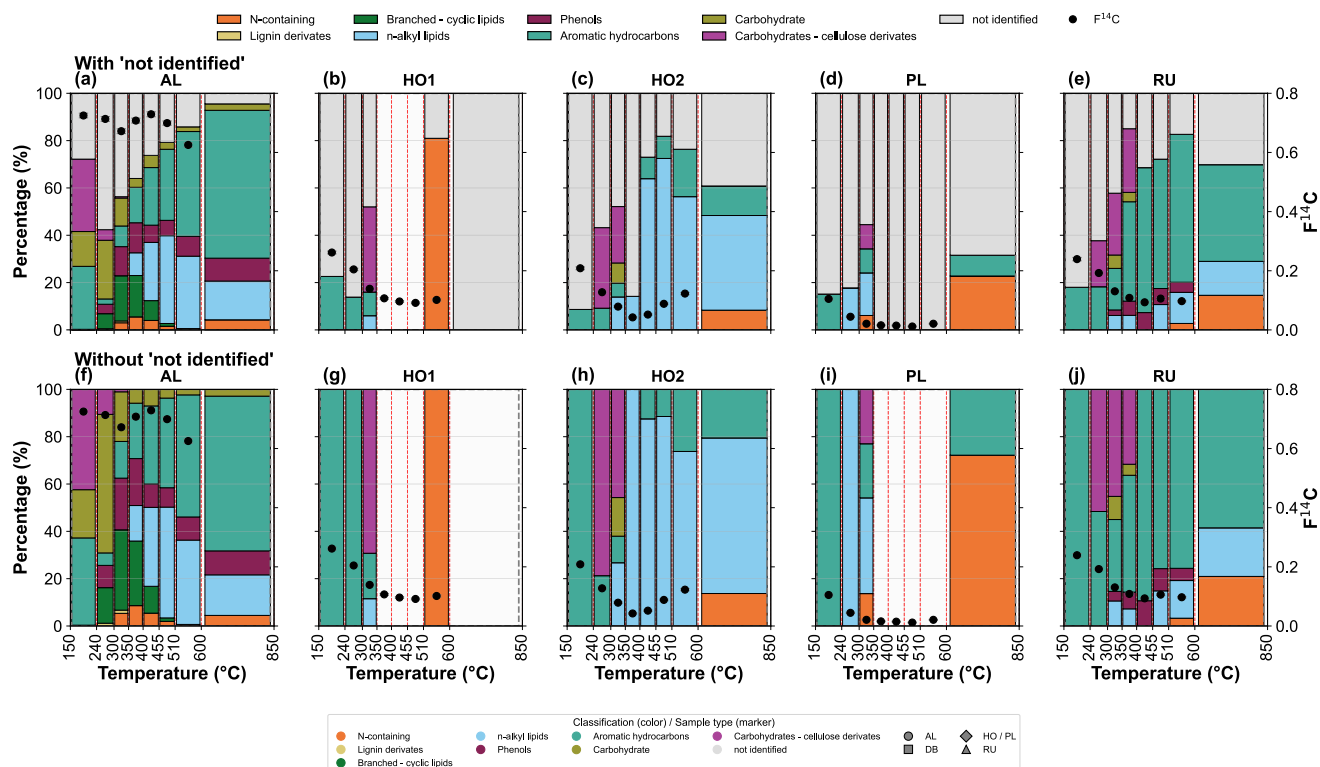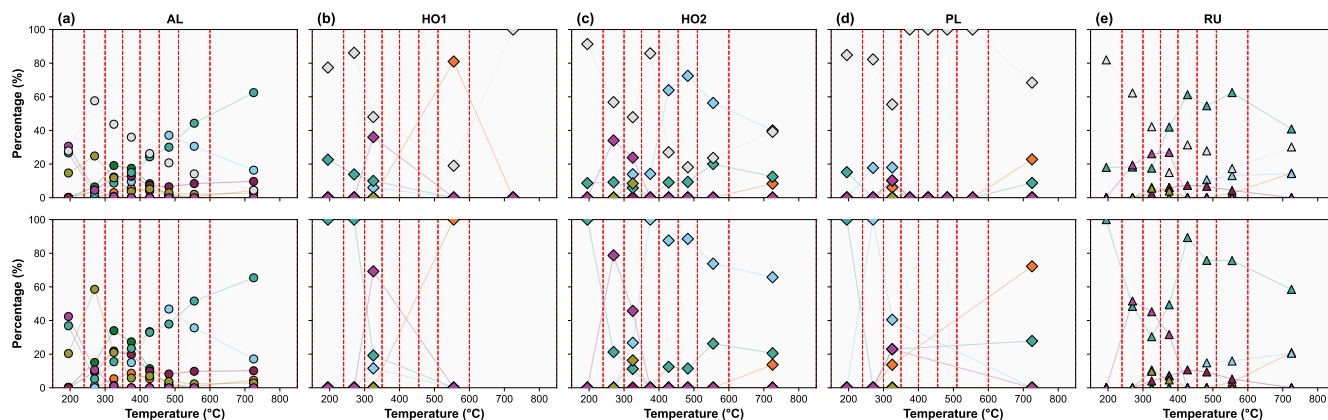

**Figure S15.** Normalised Ts-Py-GCMS peak-area distributions across thermal windows (150–850 °C) for Fm2 features.

Top two rows (a–j): stacked plots showing compound-class distributions across thermal windows. Each feature is represented by paired panels — top includes all compounds; bottom excludes “not identified” compounds to emphasise major classes (N-containing, lignin derivatives, branched/cyclic lipids, n-alkyl lipids, phenols, aromatic hydrocarbons, carbohydrates, and cellulose derivatives). Feature–panel mapping: (a, f) active layer (AL); (b, g) Holocene permafrost shallow (HO1); (c, h)

Holocene permafrost deep (HO2); (d, i) Pleistocene layer (PL); (e, j) runoff (RU). Bottom two rows (a–e): scatter plots showing relative contributions of major compound classes versus thermal window for each geomorphic feature, highlighting contrasts in compound release, preservation, and compositional variability across Fm2.

# Compound-class proportions (stacked) with F<sup>14</sup>C (points) by sample type

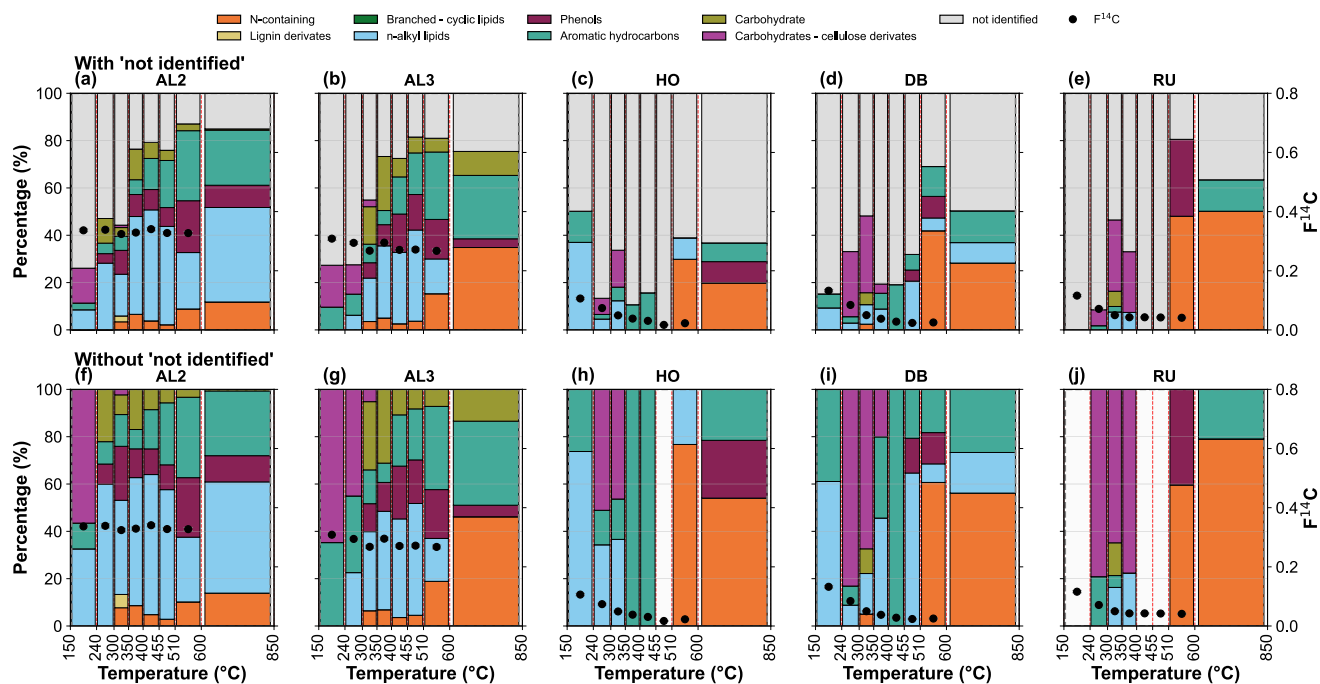

**Figure S16.** Normalised Ts-Py-GCMS peak-area distributions across thermal windows (150–850 °C) for Fm3 features.

Top two rows (a–j): stacked plots showing compound-class distributions across thermal windows. Each feature is represented by paired panels — top includes all compounds; bottom excludes “not identified” compounds to emphasise major classes (N-containing, lignin derivatives, branched/cyclic lipids, n-alkyl lipids, phenols, aromatic hydrocarbons, carbohydrates, and cellulose derivatives). Feature–panel mapping: (a, f) shallow active layer (AL2), (b, g) deep active layer (AL3), (c, h) Holocene

permafrost (HO), (d, i) runoff (RU), (e, j) debris (DB). Bottom two rows (a–e): scatter plots showing relative contributions of major compound classes versus thermal window for each geomorphic feature, highlighting systematic compositional shifts with temperature and pronounced contrasts between shallow and deep active layers.

175

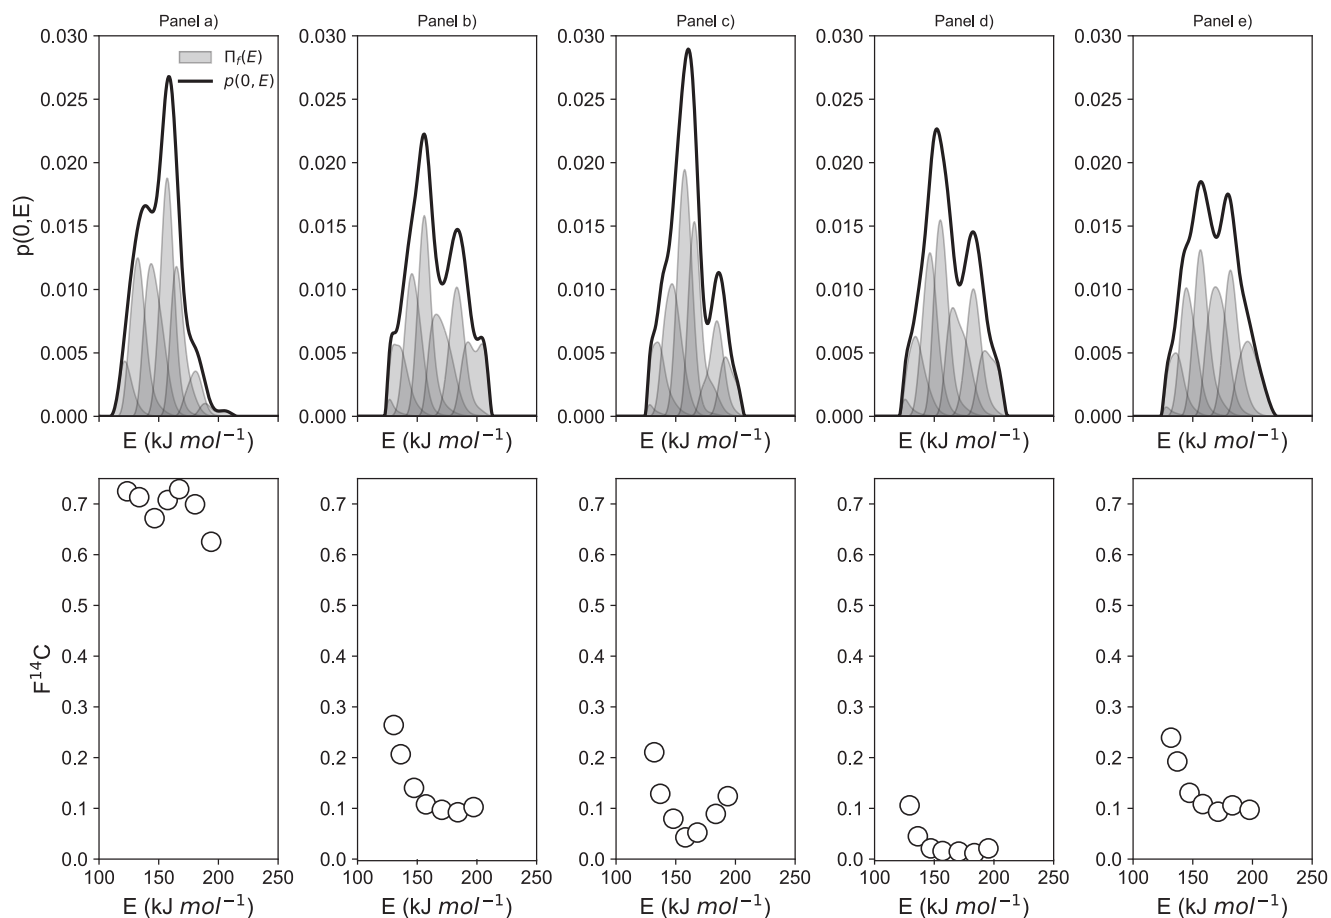

**Figure S17.** Energy distribution of organic matter thermal stability across geomorphic features at the Fm2 sit, following the energy model framework of Hemingway et al. (2019). Panels (a– e) show energy density profiles for: (a) active layer (AL), (b) and (c) Holocene permafrost (HO1, HO2), (d) Pleistocene permafrost (PL), and (e) runoff (RU). The top row displays energy distributions derived from ORO-AMS oxidation steps, while the bottom row overlays corresponding  $F^{14}C$  values on the energy axis. This comparison highlights how carbon age aligns with thermal stability across geomorphic units.



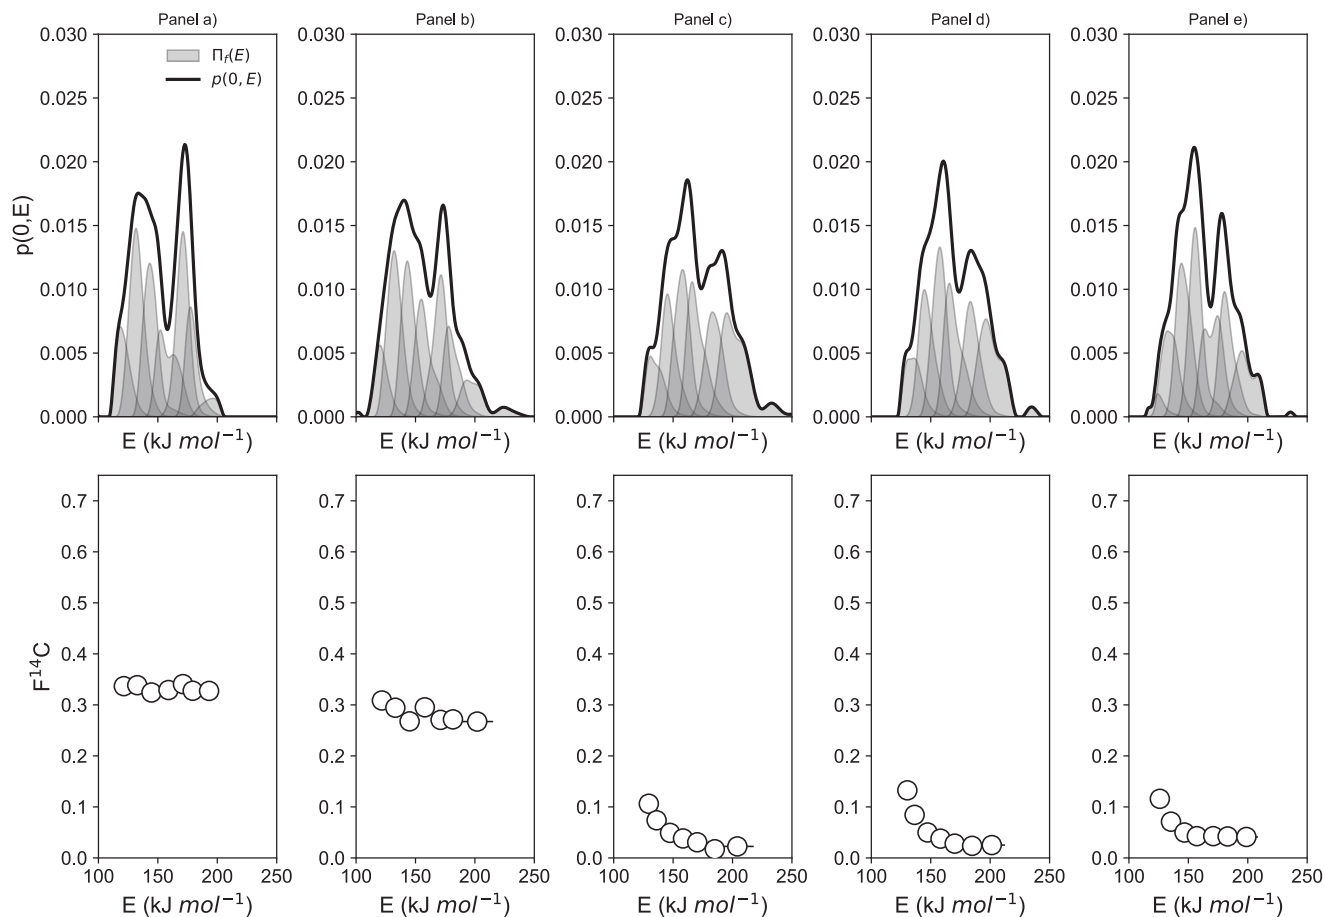

**Figure S18.** Energy distribution of organic matter thermal stability across geomorphic features at the Fm3 site, following the energy model framework of Hemingway et al. (2019). Panels (a)–(e) display the energy density profiles for: (a) active layer 2 (AL2), (b) active layer 3 (AL3), (c) Holocene permafrost (HO), (d) slump debris (DB), and (e) runoff (RU). The upper row presents energy distributions derived from ORO-AMS oxidation windows. The lower row overlays the corresponding  $F^{14}C$  values on the same energy axis, illustrating the relationship between carbon age and energetic stability across compartments.

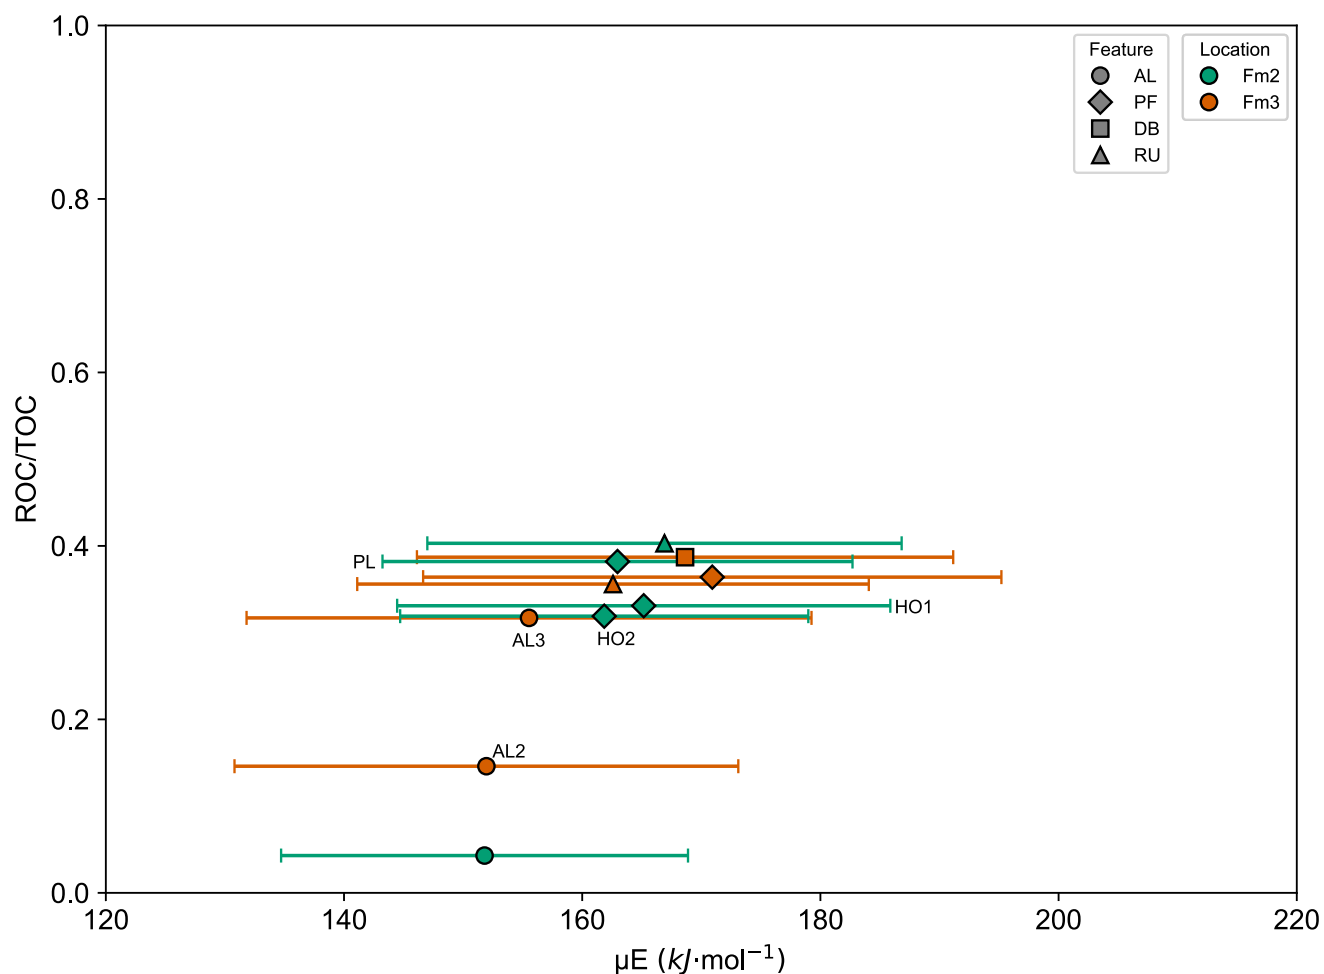

**Figure S19.** Cross-plot comparing the operationally defined recalcitrant-to-total organic carbon ratio (ROC/TOC) from ORO–AMS with mean activation energy ( $\mu E$ ) derived from kinetic modelling. Error bars denote  $\pm\sigma E$ , representing standard deviations of activation-energy distributions. Samples from FM2 (green triangles) and FM3 (red circles) follow a coherent trend in which higher ROC/TOC values generally correspond to higher activation energies, indicating that thermally resistant carbon fractions are associated with more energetically stable material. Variation within each site reflects differences in organic-matter composition across geomorphic units (AL, PF, DB, RU).
