# Supplementary material
Source: Copernicus journal article supplement (doi:10.5194/bg-23-4447-2026)
Supplement: Supplementary file [file bg-23-4447-2026-supplement-title-page.pdf › bg-23-4447-2026-supplement-title-page.pdf]

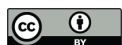

*Supplement of*

## **In-depth characterisation of organic matter thermal lability and composition from Arctic Permafrost thaw slumps**

**Marco A. Bolandini et al.**

*Correspondence to:* Marco A. Bolandini ([marcobo@eaps.ethz.ch](mailto:marcobo@eaps.ethz.ch))

- [bg-23-4447-2026-supplement-title-page.pdf](#)
- [260603\\_Thaw\\_slumps\\_supp\\_no\\_tracker.pdf](#)
- [Table\\_S4\\_PyroGCMS\\_Fm2\\_Fm3\\_150\\_850.csv](#)

The copyright of individual parts of the supplement might differ from the article licence.
